# Supplementary material for: Significant contributions of combustion-related sources to ammonia emissions
Source: PubMed Central journal article supplement (PMC9747788; doi:10.1038/s41467-022-35381-4), 2022-12-13
Supplement: 41467_2022_35381_MOESM1_ESM.pdf [file 41467_2022_35381_MOESM1_ESM.pdf]

# Supplementary Information for

## Significant contributions of combustion-related sources to ammonia emissions

Zhi-Li Chen<sup>1†</sup>, Wei Song<sup>1†</sup>, Chao-Chen Hu<sup>1</sup>, Xue-Jun Liu<sup>2</sup>, Guan-Yi Chen<sup>3</sup>, Wendell W. Walters<sup>4</sup>, Greg Michalski<sup>5</sup>, Cong-Qiang Liu<sup>1</sup>, David Fowler<sup>6</sup>, Xue-Yan Liu<sup>1\*</sup>

<sup>1</sup>School of Earth System Science, Tianjin University, Tianjin, 300072, China.

<sup>2</sup>College of Resources and Environmental Sciences, China Agricultural University, Beijing, 100193, China.

<sup>3</sup>School of Environmental Science and Engineering, Tianjin University, Tianjin 300072, China.

<sup>4</sup>Institute at Brown for Environment and Society, Brown University, 85 Waterman St, Providence, RI, 02912, United States.

<sup>5</sup>Department of Earth, Atmospheric, and Planetary Sciences, Purdue University, 550 Stadium Mall Drive, West Lafayette, IN 47907, United States.

<sup>6</sup>Centre for Ecology and Hydrology, Bush Estate, Penicuik, Midlothian, EH26 0QB, United Kingdom.

†These authors contributed equally to this work.

\*Author for correspondence (email: liuxueyan@tju.edu.cn).

### This PDF file includes:

(1) Supplementary Figures 1 to 16

(2) Supplementary Tables 1 to 5

(3) Supplementary Note 1:

- 1) Supplementary references 84–101 in Supplementary Text 1 are publications with the  $\delta^{15}\text{N}_{\text{a-NH}_3}$  observations.
- 2) Supplementary references 102–144 in Supplementary Text 2 are publications with  $\delta^{15}\text{N}_{\text{w-NH}_4^+}$  observations.
- 3) Supplementary references 145–172 in Supplementary Text 3 are publications with  $\delta^{15}\text{N}_{\text{p-NH}_4^+}$  observations.
- 4) Supplementary references 173–279 in Supplementary Text 4 are publications with simultaneous  $C_{\text{a-NH}_3}$  and  $C_{\text{p-NH}_4^+}$  observations.

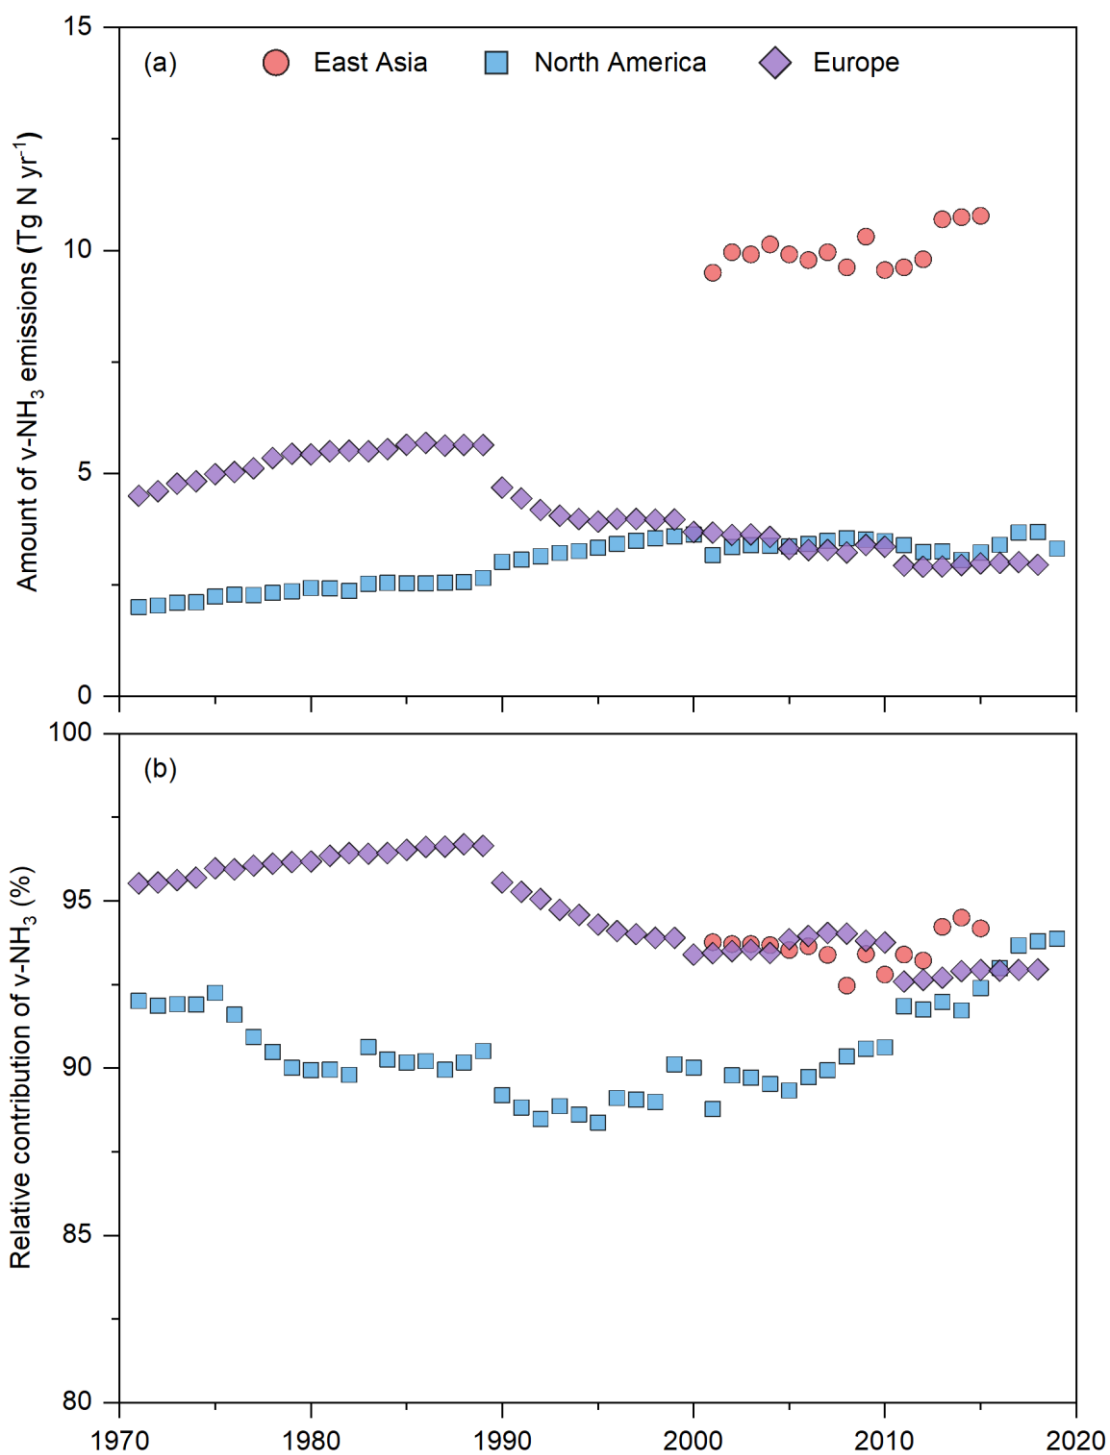

35

36 **Supplementary Fig. 1. Emission amounts (a) and relative contributions (b) of**  
 37 **volatilization NH<sub>3</sub> (v-NH<sub>3</sub>) in emission inventories of East Asia, North America,**  
 38 **and Europe.** Mean annual values of available data in emission inventories are shown,  
 39 and data sources are detailed in Supplementary Table 1.

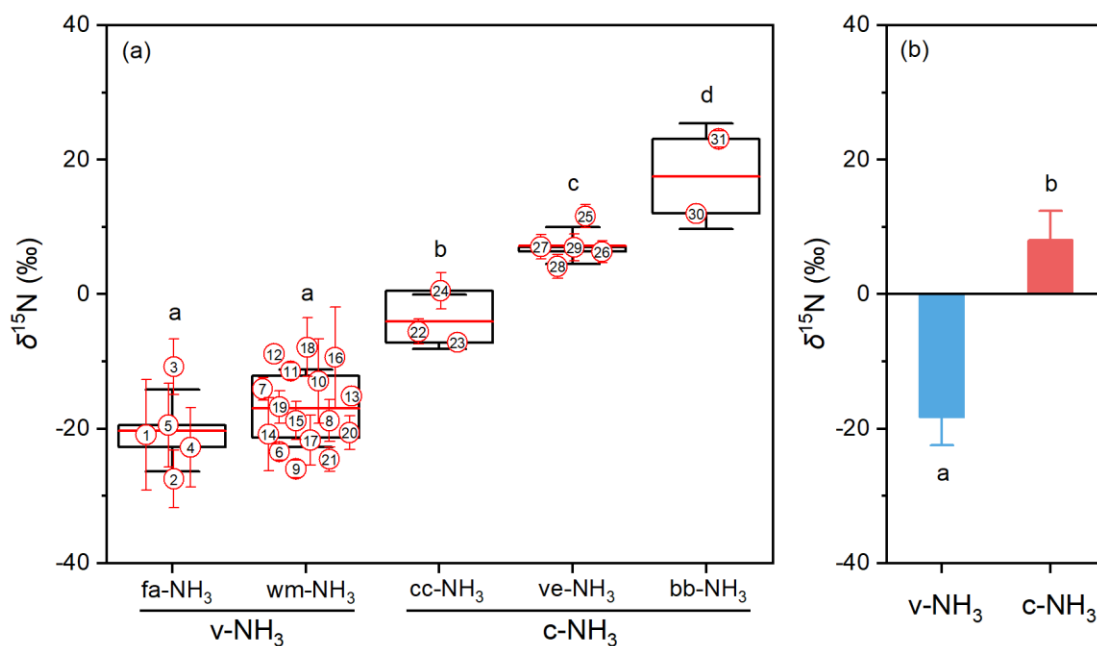

40

41 **Supplementary Fig. 2.  $\delta^{15}\text{N}$  of five major  $\text{NH}_3$  sources (a) and emission**  
 42 **inventories weighted v- $\text{NH}_3$  and c- $\text{NH}_3$  sources (b).** v- $\text{NH}_3$  represents volatilization  
 43  $\text{NH}_3$ ; c- $\text{NH}_3$  represents combustion-related  $\text{NH}_3$ ; fa- $\text{NH}_3$ , wm- $\text{NH}_3$ , cc- $\text{NH}_3$ , ve- $\text{NH}_3$ ,  
 44 and bb- $\text{NH}_3$  represent  $\text{NH}_3$  emissions from fertilizer application, waste materials, coal  
 45 combustion, vehicle exhausts, and biomass burning, respectively. In sub-figure a,  
 46 each box encompasses the 25<sup>th</sup>–75<sup>th</sup> percentiles, whiskers and the red line in each box  
 47 are the SD and mean values, respectively. In sub-figure b, emission inventories  
 48 weighted mean  $\pm$ SD values of v- $\text{NH}_3$  and c- $\text{NH}_3$  sources are shown. Calculations were  
 49 detailed in the Methods. Values with different letters (a, b, c, and d) differ  
 50 significantly at  $p < 0.05$ . The  $\delta^{15}\text{N}$  values based on the passive samplers have been  
 51 calibrated by adding  $15\text{‰}^{1-3}$ . The white-filled circles are mean  $\delta^{15}\text{N}$  values of  $\text{NH}_3$   
 52 emissions from specific sources measured in different studies. The error bars and the  
 53 numbers in the circles are SD values and data sources.

54 1: Fertilizer in the field, passive sampler (denoted as P)<sup>4</sup>;

55 2: Urea-ammonia-nitrate fertilizer in the field, P<sup>5</sup>;

56 3: Urea in the field, active sampler (denoted as A)<sup>6</sup>;

57 4: Urea in the lab, P<sup>7</sup>;

58 5: Fertilizer in the green land, A<sup>8</sup>;

59 6: Human excreta, P<sup>9</sup>;

60 7: Pig wastes, P<sup>9</sup>;

61 8: Solid wastes, P<sup>9</sup>;

62 9: Wastewater, P<sup>9</sup>;

63 10: Cow wastes, P<sup>5</sup>;

64 11: Cow wastes, A<sup>10</sup>;

65 12: Chicken wastes, A<sup>11</sup>;

66 13: Sheep wastes, A<sup>11</sup>;

67 14: Dairy cow wastes, A<sup>12</sup>;

68 15: Cow wastes, P<sup>13</sup>;

69 16: Cow wastes, A<sup>14</sup>;

70 17: Human excreta, A<sup>8</sup>;

71 18: Cow wastes, A<sup>8</sup>;

72 19: Chicken wastes, A<sup>8</sup>;

- 73 20: Human excreta, A<sup>15</sup>;  
74 21: Pig farm and dairy farm, A<sup>6</sup>;  
75 22: Brown coal combustion, A<sup>10</sup>;  
76 23: Hard coal combustion, A<sup>10</sup>;  
77 24: Household coal combustion, A<sup>16</sup>;  
78 25: Vehicle exhaust sampled in a tunnel, P<sup>5</sup>;  
79 26: Vehicle exhaust sampled in a tunnel, A<sup>17</sup>;  
80 27: Vehicle exhaust sampled at a roadside, A<sup>3</sup>;  
81 28: Vehicle exhaust sampled in a tunnel, A<sup>3</sup>;  
82 29: Vehicle exhaust sampled on the road, A<sup>3</sup>;  
83 30: Biomass burning estimated by aerosol NH<sub>4</sub><sup>+</sup> in winter at Yurihonjo, Japan<sup>18</sup>;  
84 31: Biomass burning estimated by aerosol NH<sub>4</sub><sup>+</sup> in autumn at Nanchang, China<sup>19</sup>.

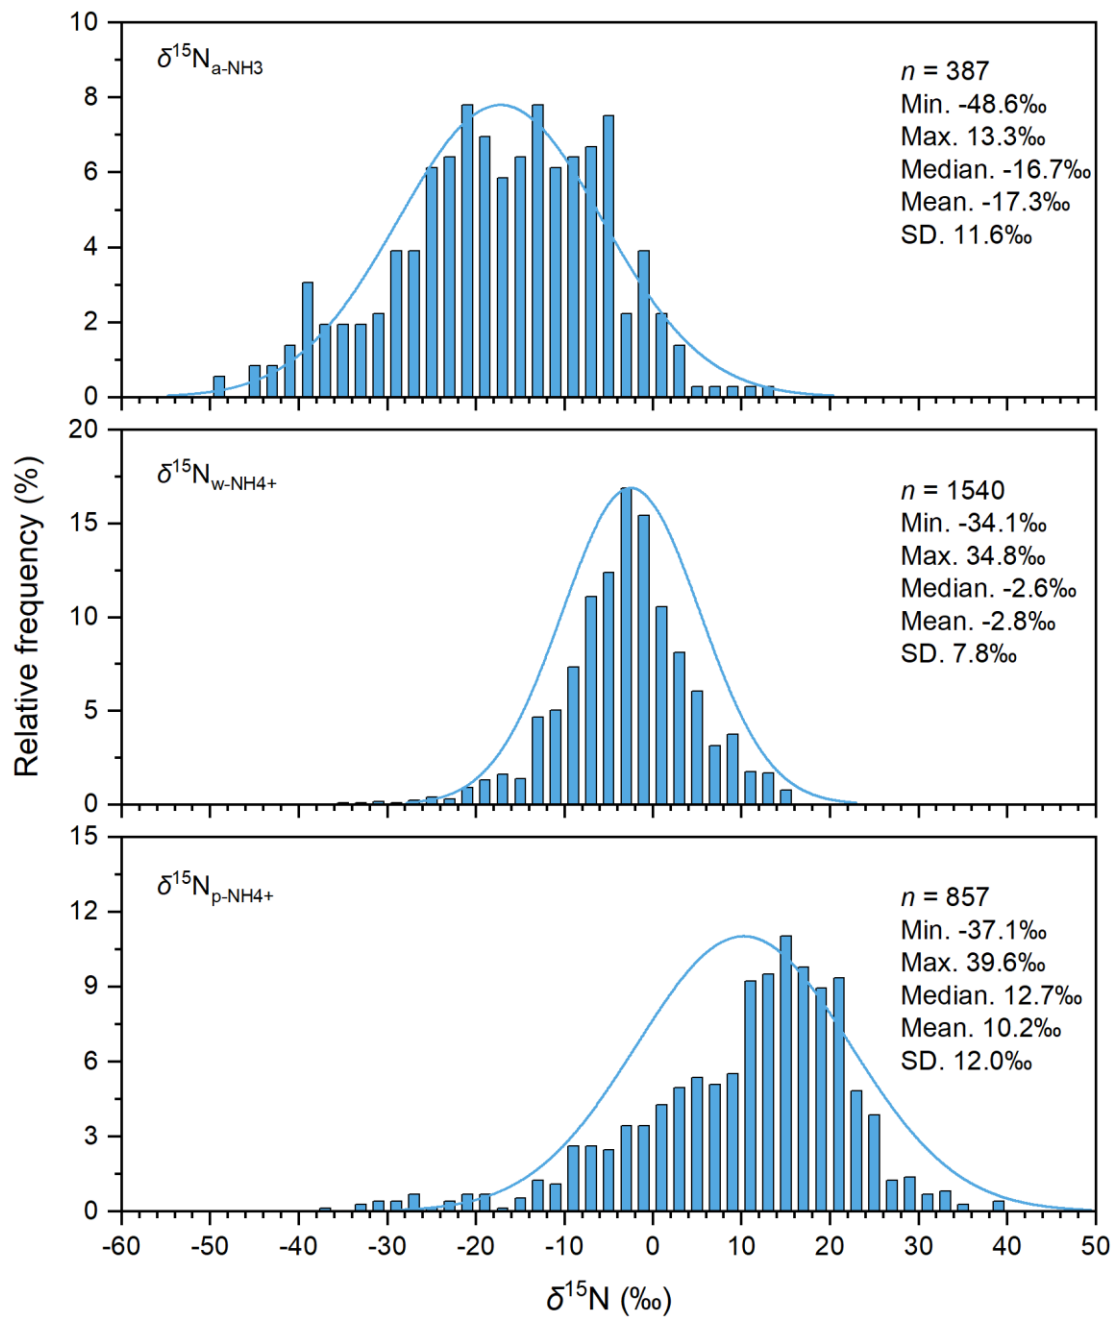

85

86 **Supplementary Fig. 3. Relative frequency histograms of  $\delta^{15}\text{N}_{\text{a-NH}_3}$ ,  $\delta^{15}\text{N}_{\text{w-NH}_4^+}$ ,**  
 87 **and  $\delta^{15}\text{N}_{\text{p-NH}_4^+}$ .** Replicate measurements ( $n$ ) at all sites (Fig. 2) were used. The  $\delta^{15}\text{N}_{\text{a-NH}_3}$   
 88  $\text{NH}_3$  data sources are listed in Supplementary Text 1. The  $\delta^{15}\text{N}_{\text{w-NH}_4^+}$  data sources are  
 89 listed in Supplementary Text 2. The  $\delta^{15}\text{N}_{\text{p-NH}_4^+}$  data sources are listed in  
 90 Supplementary Text 3.

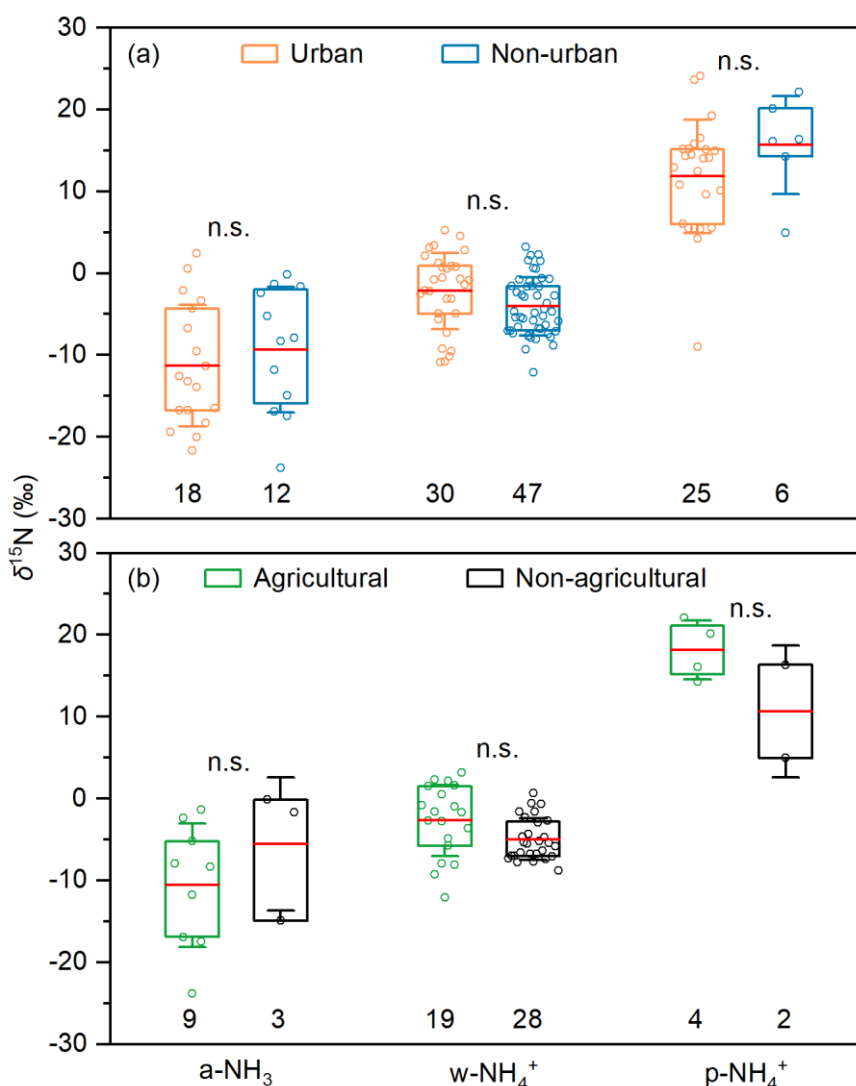

91

92 **Supplementary Fig. 4.  $\delta^{15}\text{N}$  of a-NH<sub>3</sub>, w-NH<sub>4</sub><sup>+</sup>, and p-NH<sub>4</sub><sup>+</sup> at urban and non-**  
 93 **urban sites (a) and agricultural and non-agricultural sites (b).** Circles around each  
 94 box show mean values of replicate measurements at each site (6–36 and 2–20 for a-  
 95 NH<sub>3</sub> at urban and non-urban sites, respectively; 1–61 and 1–156 for w-NH<sub>4</sub><sup>+</sup> at urban  
 96 and non-urban sites, respectively; 1–169 and 1–84 for p-NH<sub>4</sub><sup>+</sup> at urban and non-urban  
 97 sites, respectively). In sub-figure b, non-urban sites are further divided into  
 98 agricultural and non-agricultural sites (2–20 and 7–12 for a-NH<sub>3</sub> at agricultural and  
 99 non-agricultural sites, respectively; 1–156 and 1–137 for w-NH<sub>4</sub><sup>+</sup> at agricultural and  
 100 non-agricultural sites, respectively; 1–77 and 5–84 for p-NH<sub>4</sub><sup>+</sup> at agricultural and  
 101 non-agricultural sites, respectively).  $\delta^{15}\text{N}_{\text{a-NH}_3}$  based on the passive samplers has been  
 102 calibrated by adding 15‰<sup>1–3</sup>. Each box encompasses the 25<sup>th</sup>–75<sup>th</sup> percentiles,  
 103 whiskers and the red line in each box are the SD and mean values, respectively. The  
 104 numbers below the boxes are those of observation sites. n.s. indicates no significant  
 105 differences in  $\delta^{15}\text{N}$  between urban and non-urban or agricultural and non-agricultural  
 106 sites at  $p < 0.05$ .

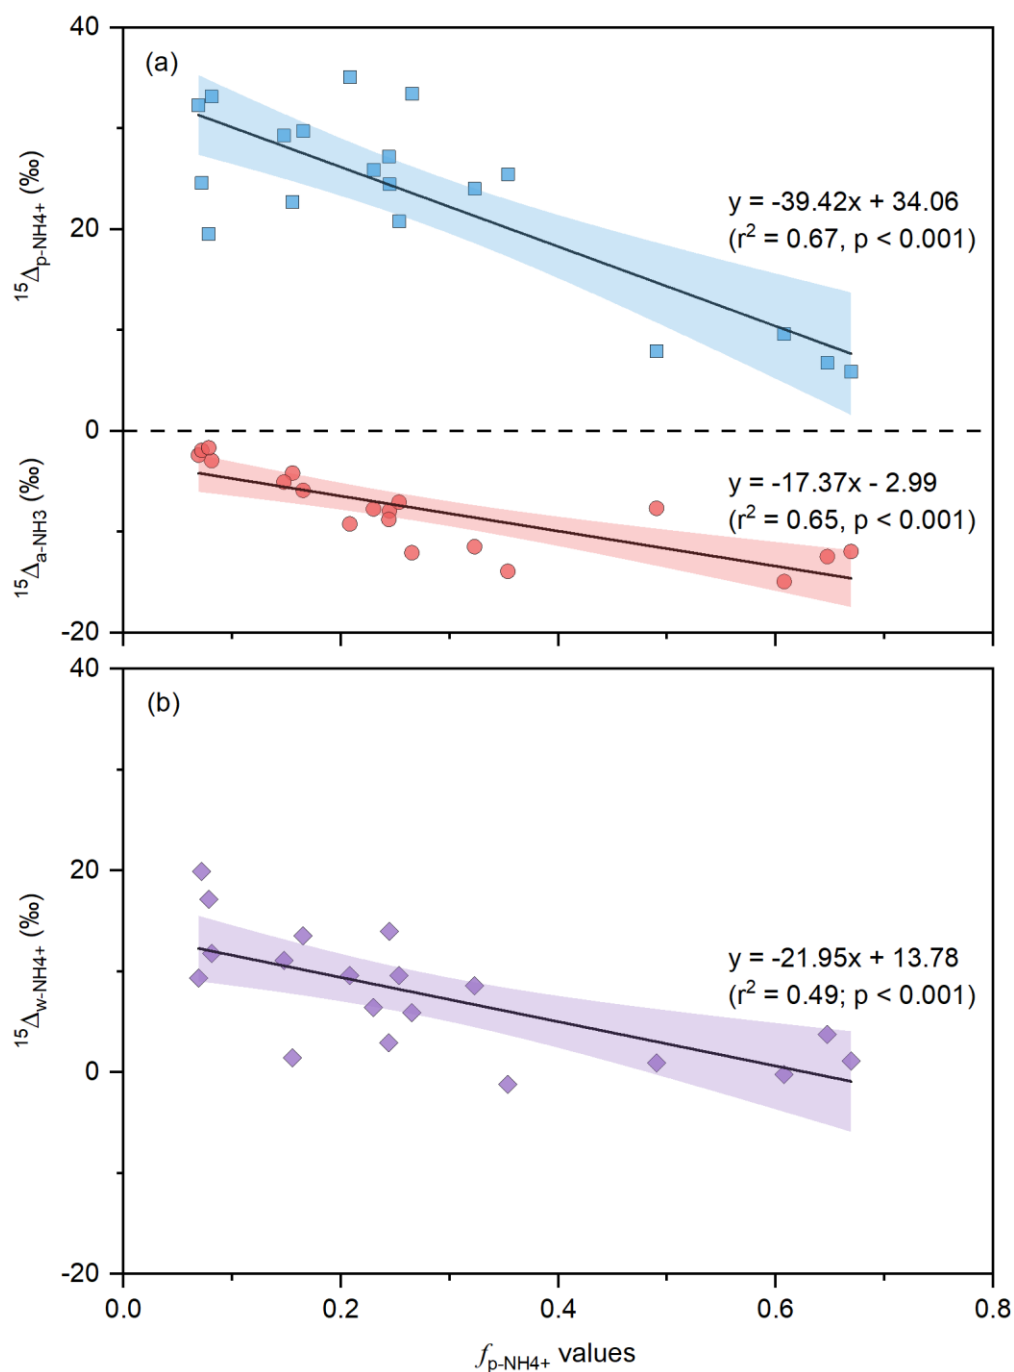

107

108 **Supplementary Fig. 5. Correlation of  $^{15}\Delta_{a-NH3}$ ,  $^{15}\Delta_{p-NH4+}$ , and  $^{15}\Delta_{w-NH4+}$  with  $f_{p-NH4+}$**   
 109 **(i.e.,  $C_{p-NH4+}/(C_{a-NH3}+C_{p-NH4+})$ ) in the atmosphere.** Simultaneous observation data of  
 110 seasonal mean  $C_{a-NH3}$ ,  $C_{p-NH4+}$ , and corresponding  $^{15}\Delta_{a-NH3}$ ,  $^{15}\Delta_{p-NH4+}$ , and  $^{15}\Delta_{w-NH4+}$   
 111 ( $n=19$  for each) at six sites (Supplementary Table 5) are used. The shade is the 95%  
 112 confidence interval. Calculations of  $^{15}\Delta_{a-NH3}$ ,  $^{15}\Delta_{p-NH4+}$ , and  $^{15}\Delta_{w-NH4+}$  are detailed in  
 113 Methods.

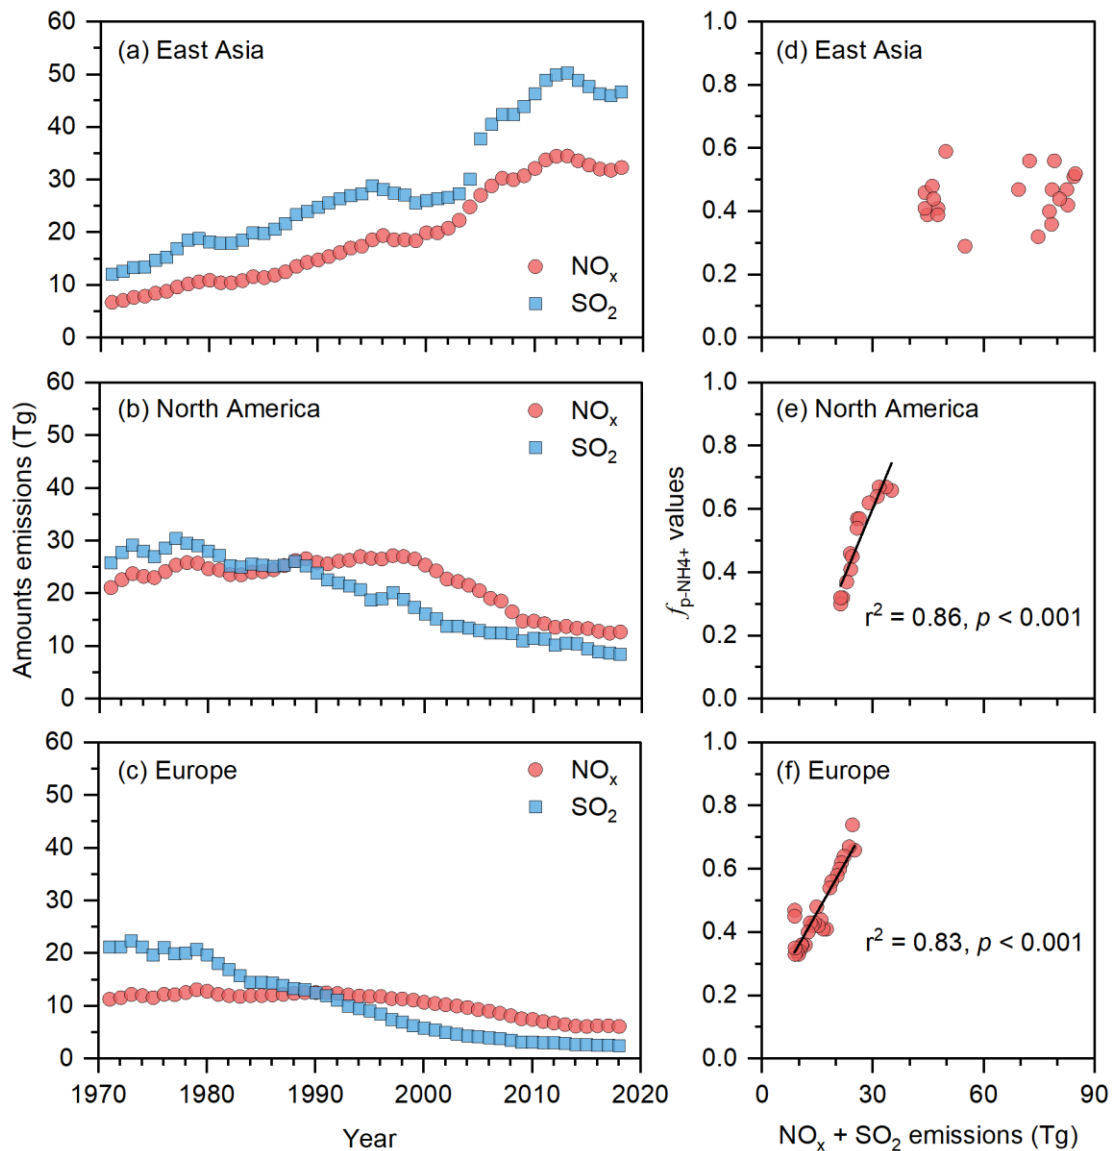

114

115 **Supplementary Fig. 6. Emission amounts of NO<sub>x</sub> and SO<sub>2</sub> (a, b, and c) and**  
 116 **correlation between  $f_{p-NH_4^+}$  and the emission of NO<sub>x</sub> and SO<sub>2</sub> in East Asia (d),**  
 117 **North America (e), and Europe (f).** Data on NO<sub>x</sub> and SO<sub>2</sub> emissions were  
 118 downloaded from<sup>4</sup>. The annual mean  $f_{p-NH_4^+}$  values in East Asia during 1993–2018,  
 119 North America during 2004–2018, and Europe during 1990–2017 (detailed in  
 120 Supplementary Fig. 7) were used. East Asia includes China, Japan, and Korea. North  
 121 America includes both USA and Canada. Europe includes Austria, Belgium, Denmark,  
 122 Faroe Islands, Finland, France, Germany, Gibraltar, Greece, Greenland, Iceland, Italy,  
 123 Ireland, Luxembourg, Norway, Netherlands, Portugal, Spain, Sweden, Switzerland,  
 124 and United Kingdom.



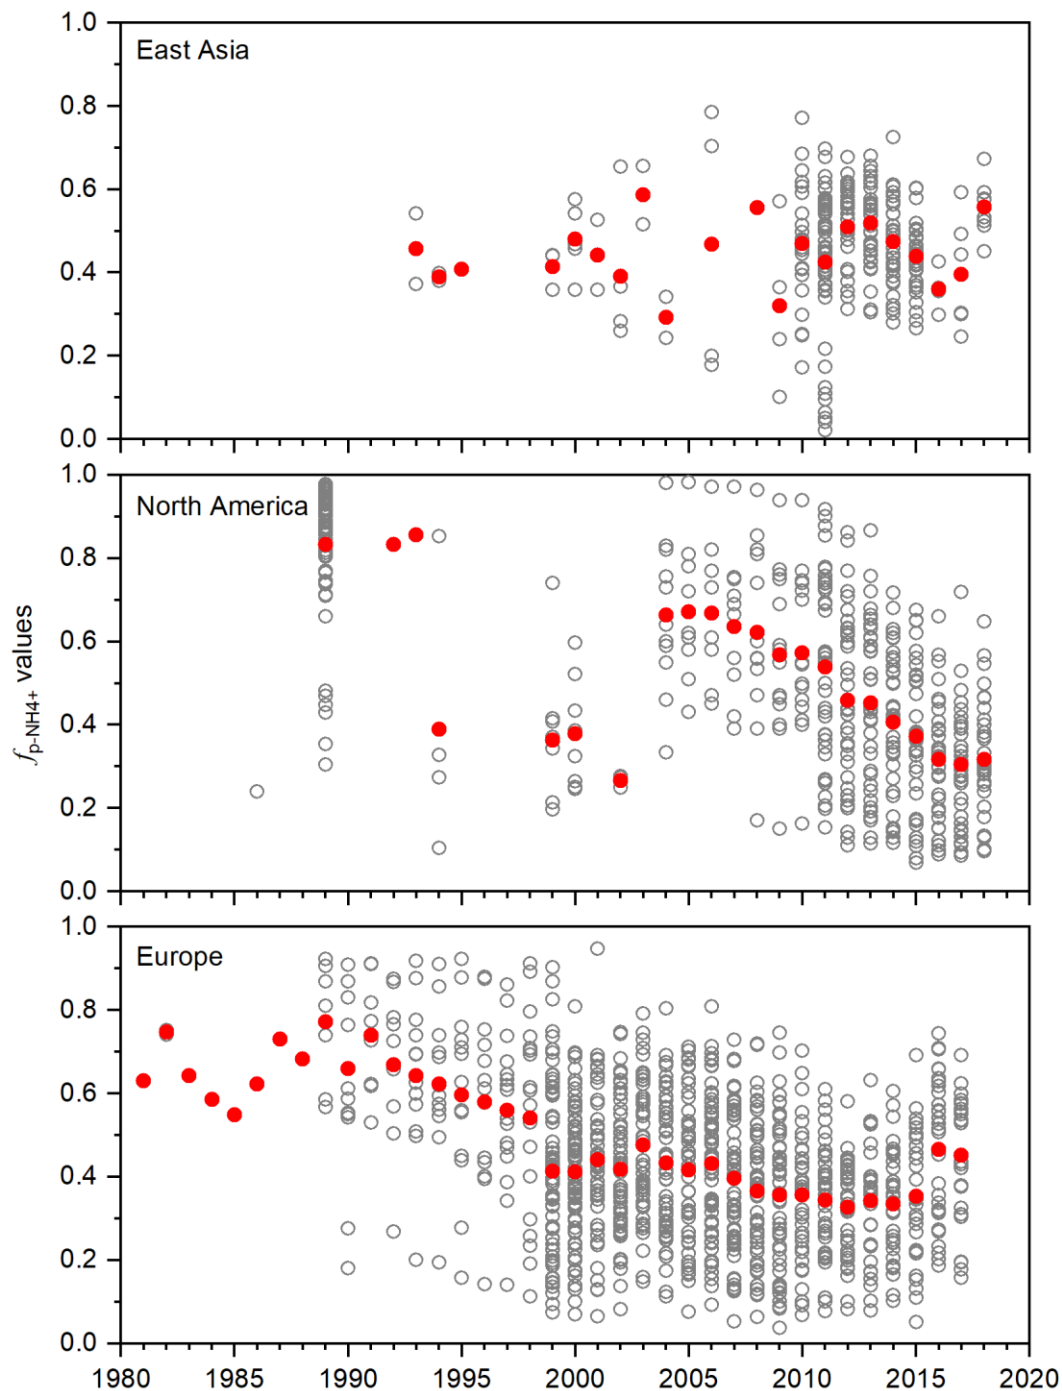

125

126 **Supplementary Fig. 7. Time series of  $f_{p-NH4+}$  (i.e.,  $C_{p-NH4+}/(C_{a-NH3}+C_{p-NH4+})$ ) in the**  
 127 **atmosphere.** Grey circles are site-based mean values of replicate measurements  
 128 ( $n=1-55$  in East Asia,  $n=1-59$  in North America,  $n=1-68$  in Europe) in each region.  
 129 The red-filled circle is the mean value of site-based observation values (Grey circles)  
 130 available for the corresponding year. The data sources (references) in the figure are  
 131 listed in Supplementary Text 4.

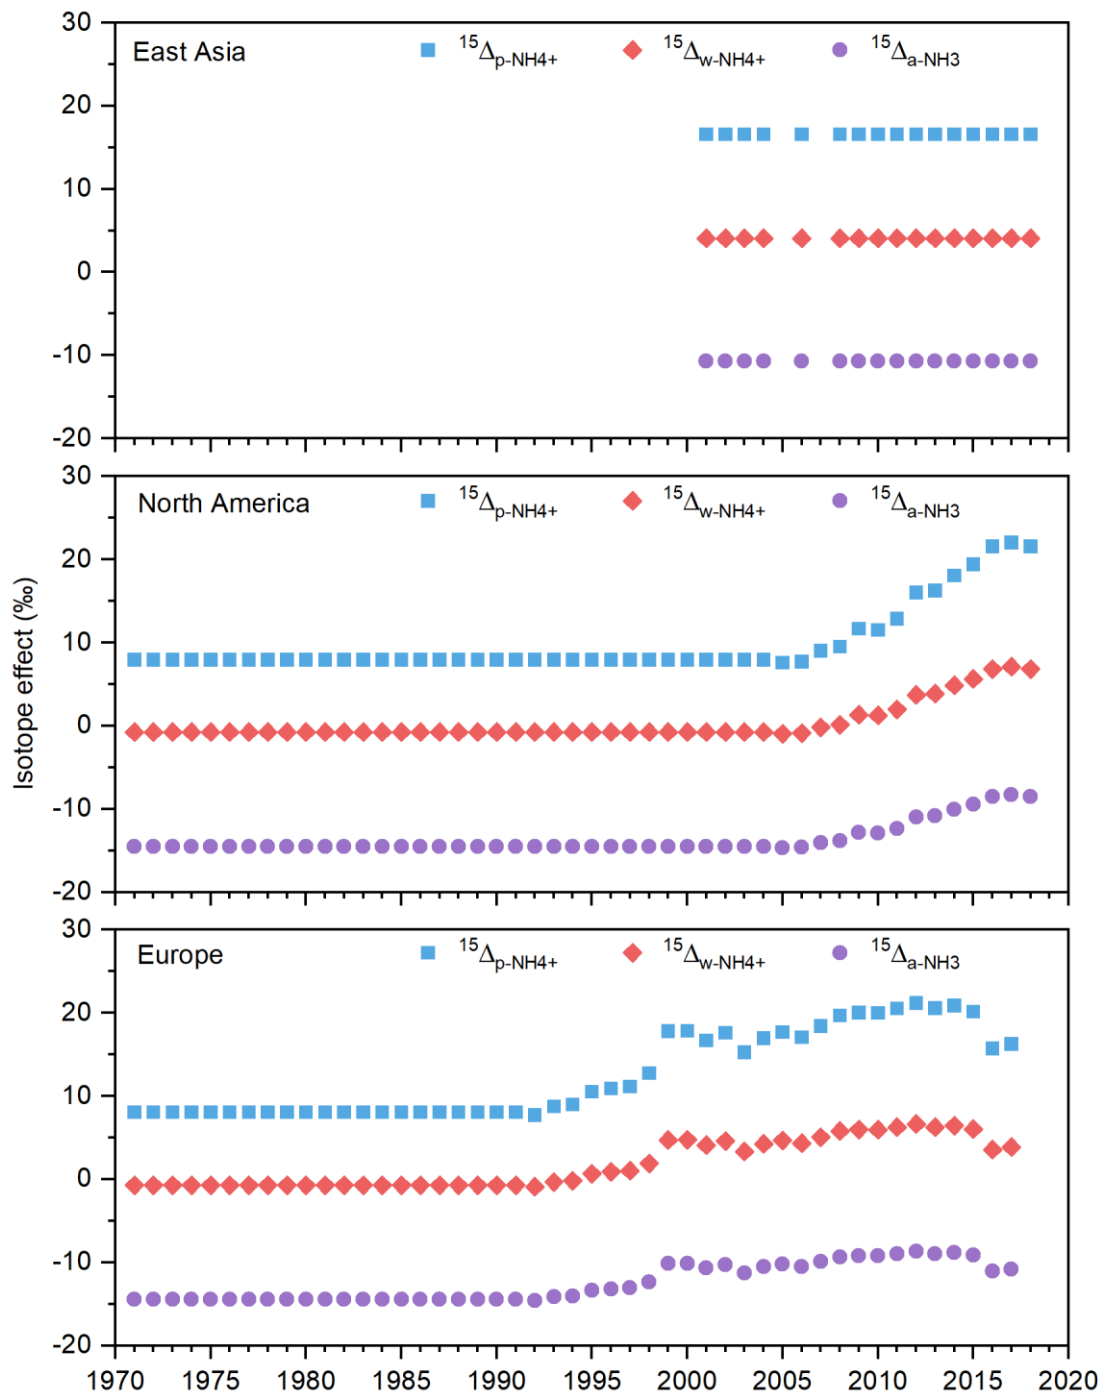

132

133 **Supplementary Fig. 8. Annual mean  $^{15}\Delta_{a-NH3}$ ,  $^{15}\Delta_{w-NH4+}$ , and  $^{15}\Delta_{p-NH4+}$  in each**  
 134 **region. Calculations are detailed in Methods.**

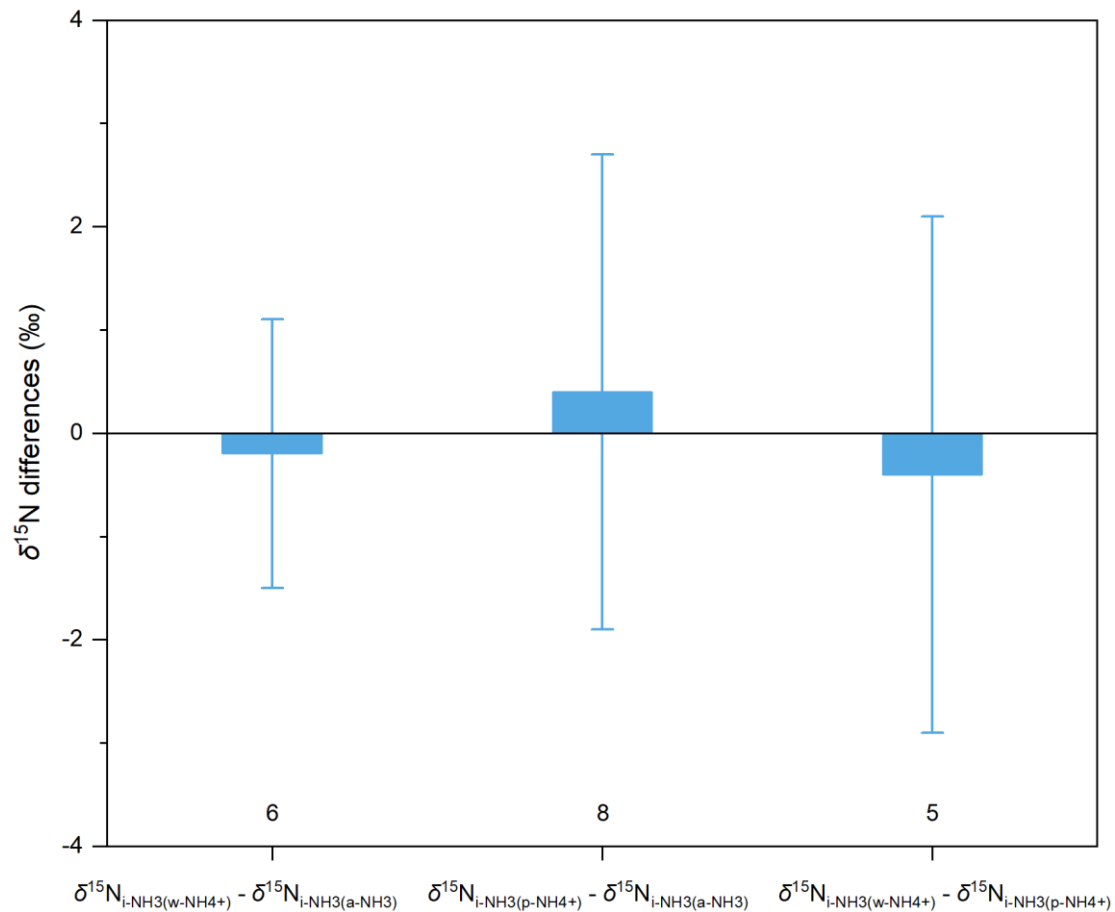

135

136

137

138

139

140

141

142

**Supplementary Fig. 9. Differences between the paired  $\delta^{15}\text{N}_{\text{i-NH}_3(\text{a-NH}_3)}$  and  $\delta^{15}\text{N}_{\text{i-NH}_3(\text{w-NH}_4+)}$  ( $\delta^{15}\text{N}_{\text{i-NH}_3(\text{w-NH}_4+)}$  -  $\delta^{15}\text{N}_{\text{i-NH}_3(\text{a-NH}_3)}$ ),  $\delta^{15}\text{N}_{\text{i-NH}_3(\text{a-NH}_3)}$  and  $\delta^{15}\text{N}_{\text{i-NH}_3(\text{p-NH}_4+)}$  ( $\delta^{15}\text{N}_{\text{i-NH}_3(\text{p-NH}_4+)}$  -  $\delta^{15}\text{N}_{\text{i-NH}_3(\text{a-NH}_3)}$ ),  $\delta^{15}\text{N}_{\text{i-NH}_3(\text{p-NH}_4+)}$  and  $\delta^{15}\text{N}_{\text{i-NH}_3(\text{w-NH}_4+)}$  ( $\delta^{15}\text{N}_{\text{i-NH}_3(\text{w-NH}_4+)}$  -  $\delta^{15}\text{N}_{\text{i-NH}_3(\text{p-NH}_4+)}$ ).** Error bars represent standard error. Numbers below the bars are observation sites (detailed in Supplementary Table 4). Calculations were based on simultaneous observations on either  $\delta^{15}\text{N}_{\text{a-NH}_3}$  and  $\delta^{15}\text{N}_{\text{p-NH}_4+}$ ,  $\delta^{15}\text{N}_{\text{a-NH}_3}$  and  $\delta^{15}\text{N}_{\text{w-NH}_4+}$ ,  $\delta^{15}\text{N}_{\text{p-NH}_4+}$  and  $\delta^{15}\text{N}_{\text{w-NH}_4+}$  (detailed in Methods).

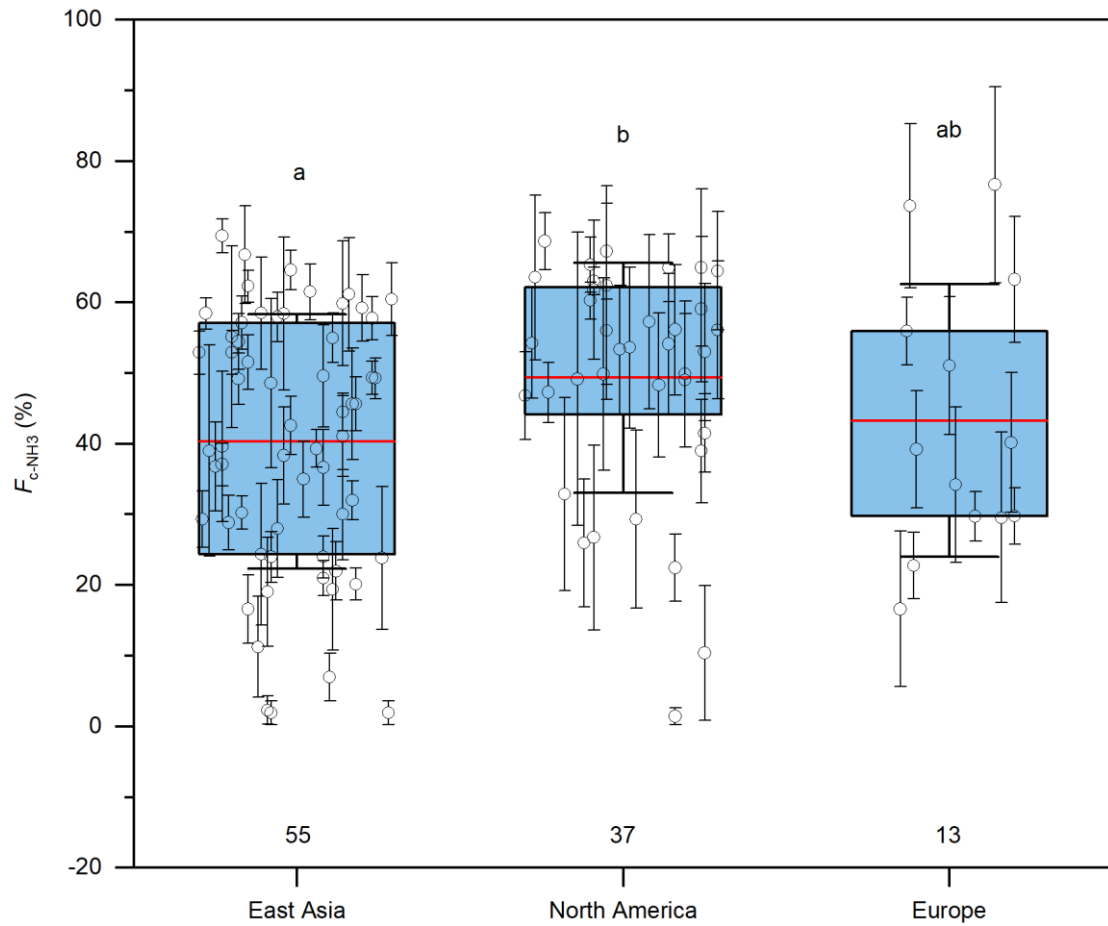

143

144 **Supplementary Fig. 10.  $F_{C-NH_3}$  values in East Asia, North America, and Europe.**  
 145 Circles and error bars around each box show mean $\pm$ SD of  $F_{C-NH_3}$  at each site. Each  
 146 box encompasses the 25<sup>th</sup>–75<sup>th</sup> percentiles, whiskers and the red line in each box are  
 147 SD and mean values, respectively. The numbers below the boxes represent the  
 148 numbers of observation sites in each region. Different letters (a and b) above the  
 149 boxes indicate a significant difference ( $p < 0.05$ ) among the three regions. Calculations  
 150 were detailed in Methods.

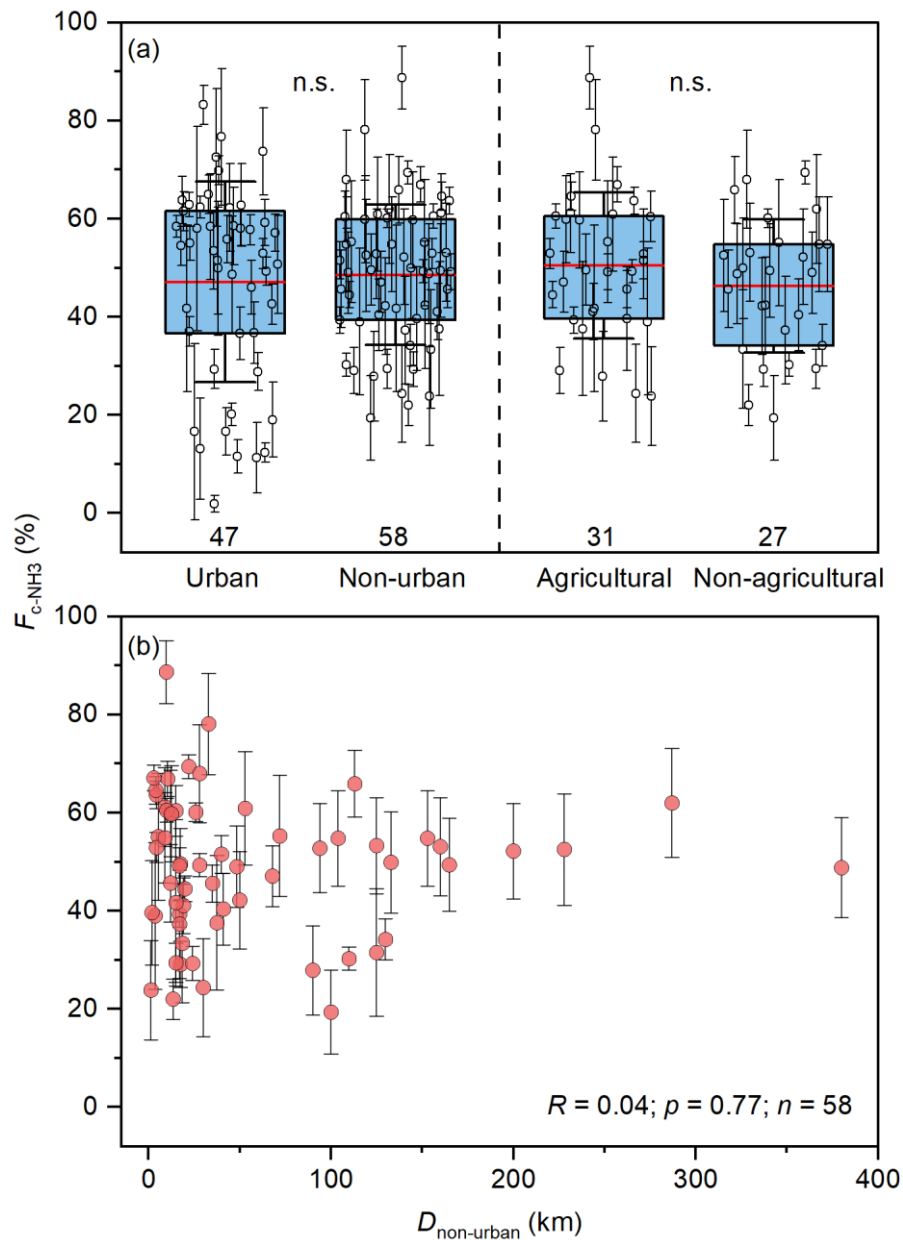

151

152 **Supplementary Fig. 11. (a) Mean  $F_{c-NH_3}$  of urban, non-urban, agricultural, and**  
 153 **non-agricultural sites, and (b) variations of  $F_{c-NH_3}$  at non-urban sites with the**  
 154 **corresponding distances from the edge of the nearest urban area ( $D_{non-urban}$ ).**

155 Error bars represent SD. In sub-figure a, each box encompasses the 25<sup>th</sup>–75<sup>th</sup>  
 156 percentiles, whiskers and the red line in each box are SD and mean values,  
 157 respectively. Numbers below the boxes are the numbers of observation sites. n.s.: no  
 158 significance. In sub-figure b, the  $D_{non-urban}$  values were measured by using the  
 159 coordinate information and Google Earth (<https://earth.google.com>).

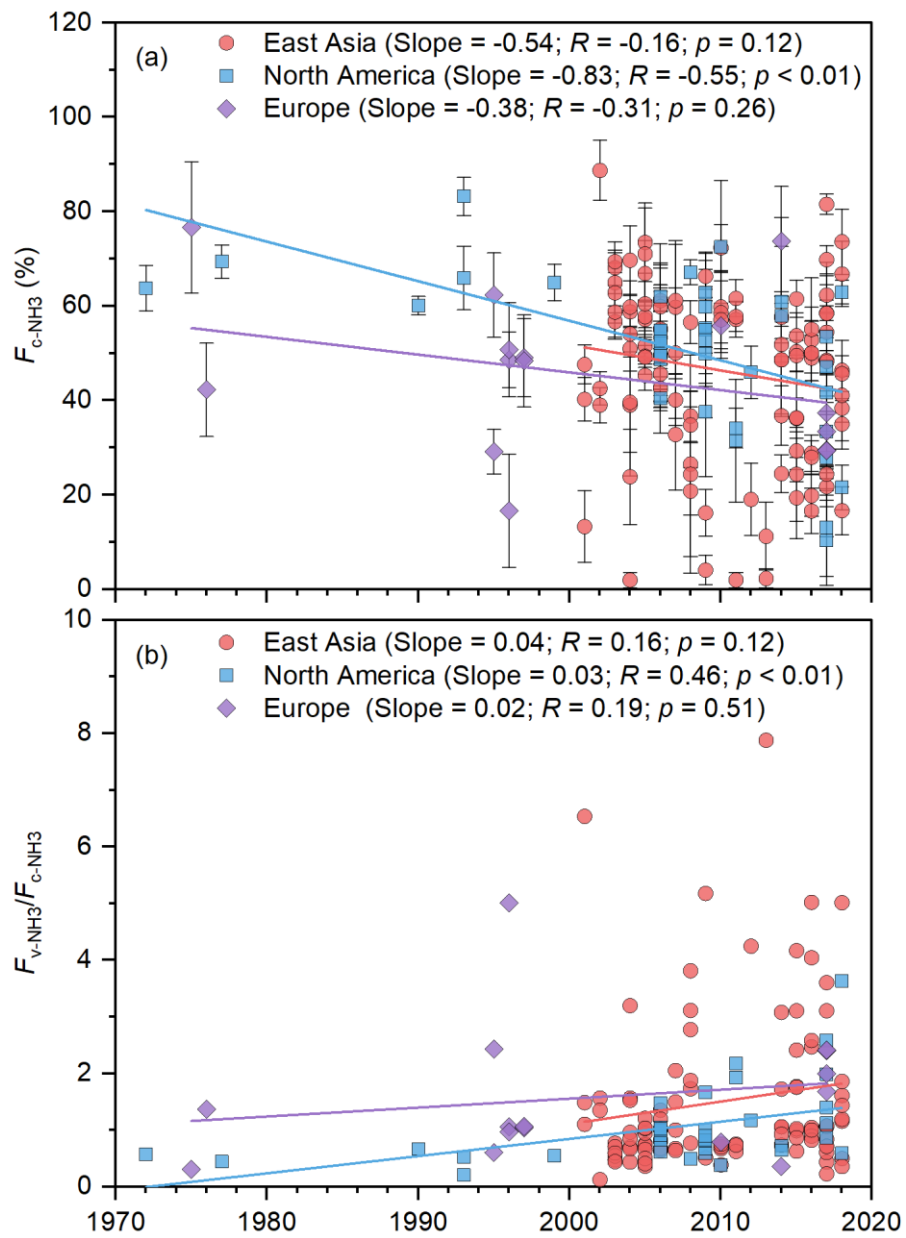

160

161 **Supplementary Fig. 12. Relative contributions of c-NH<sub>3</sub> (a) and the ratio of F<sub>v</sub>-**  
 162 **NH<sub>3</sub> to F<sub>c</sub>-NH<sub>3</sub> (b) in East Asia, North America, and Europe. Error bars represent SD.**  
 163 **Calculations were detailed in the Methods.**

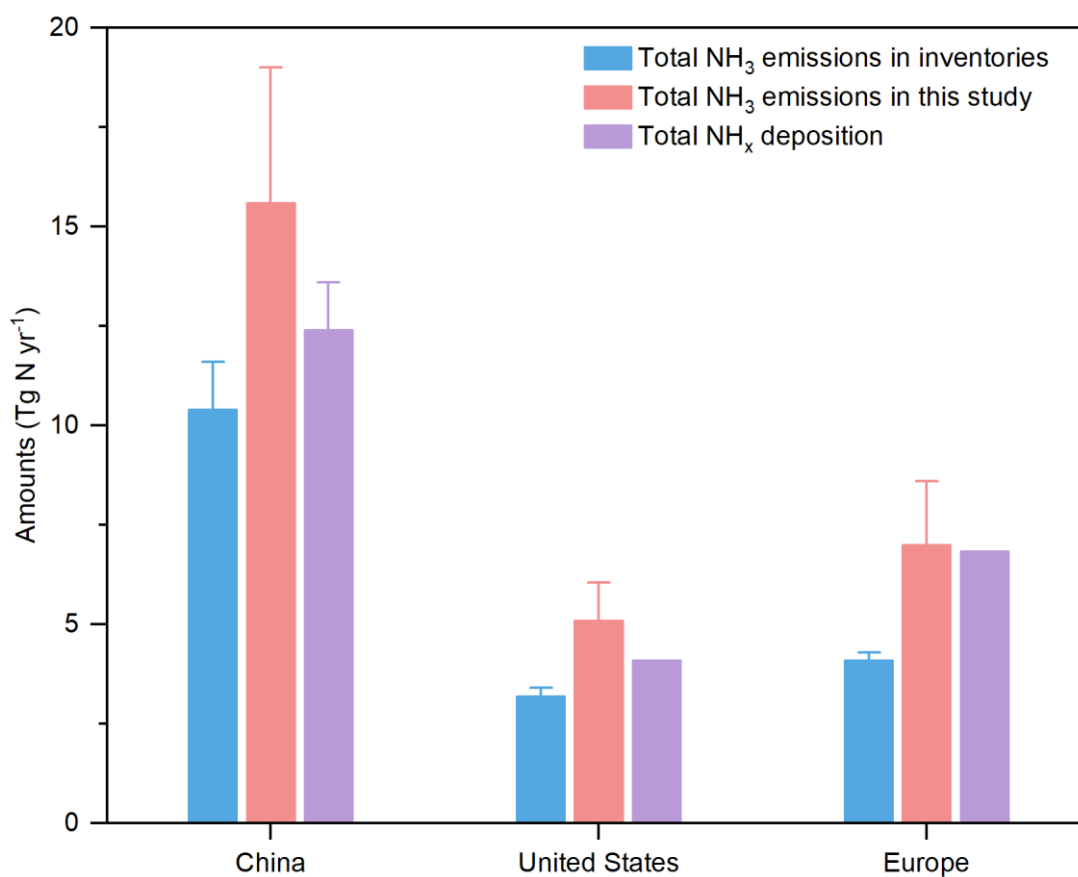

164

165 **Supplementary Fig. 13. Total amounts of NH<sub>3</sub> emissions and NH<sub>x</sub> deposition in**  
 166 **China, the United States, and Europe.** Error bars represent SD. Data on total NH<sub>3</sub>  
 167 emissions in inventories were cited from Supplementary Table 1. Calculations of total  
 168 NH<sub>3</sub> emission amounts were detailed in the Methods. Data of the NH<sub>x</sub> deposition (i.e.,  
 169 the sum of a-NH<sub>3</sub>, p-NH<sub>4</sub><sup>+</sup>, and w-NH<sub>4</sub><sup>+</sup> deposition) were cited from refs. 21–26.

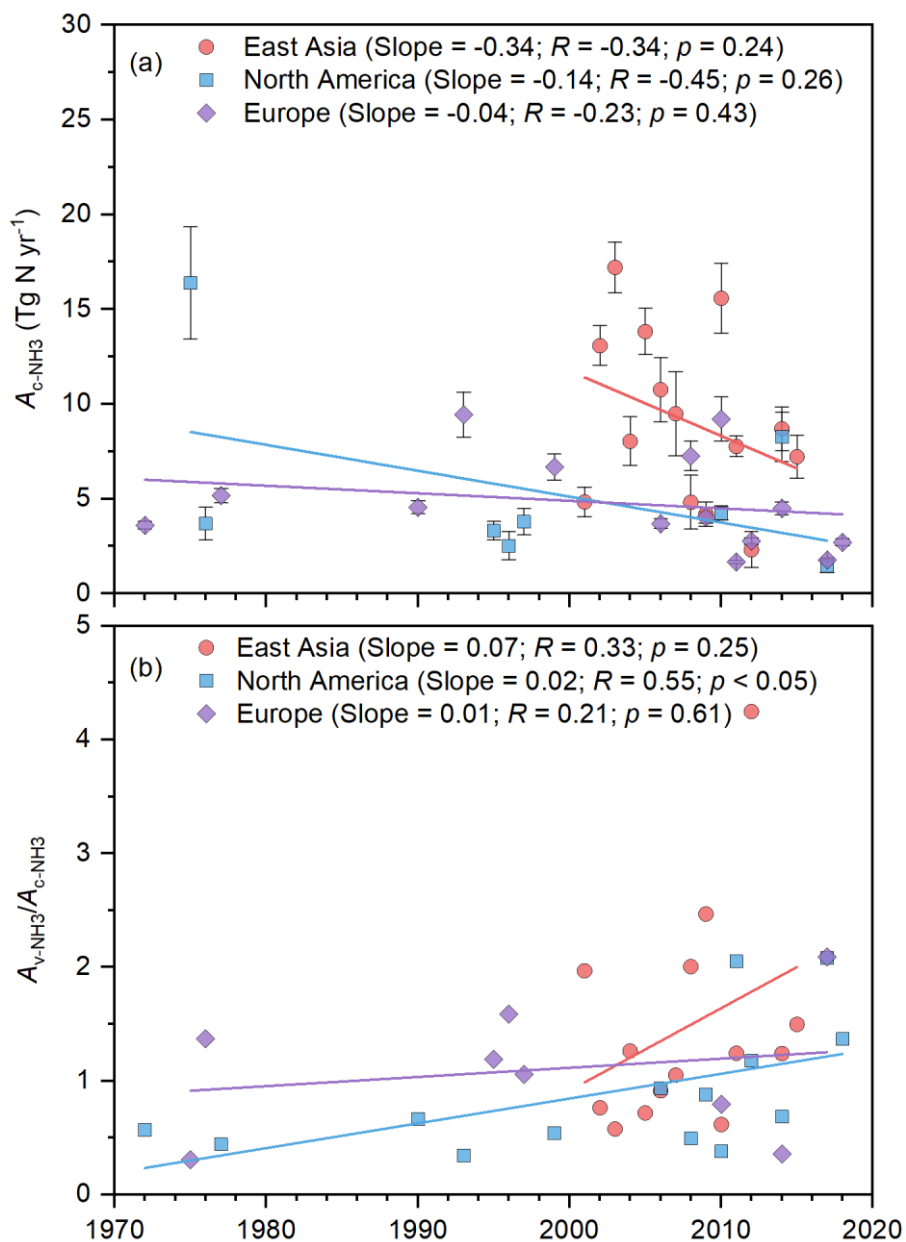

170

171 **Supplementary Fig. 14. Amounts of c-NH<sub>3</sub> emission (a) and the ratio of A<sub>v-NH<sub>3</sub></sub> to**  
 172 **A<sub>c-NH<sub>3</sub></sub> (b) in East Asia, North America, and Europe.** Error bars represent SD. The  
 173 calculations and data sources were detailed in the Methods.



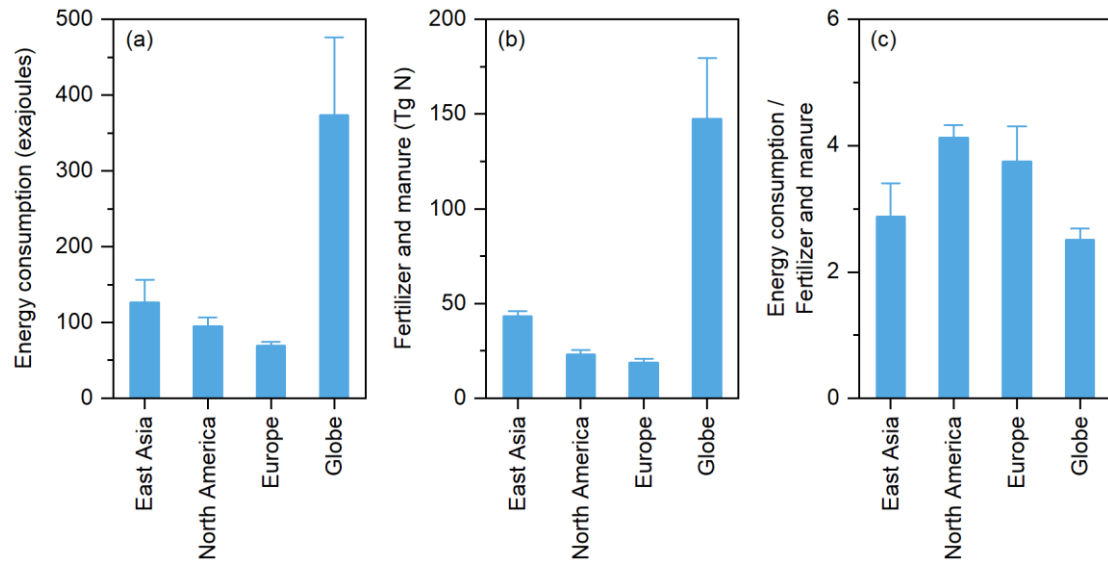

174

175 **Supplementary Fig. 15. The spatial difference in amounts of energy consumption**  
 176 **(a), fertilizer consumption and animal manure (b), and the ratio of energy**  
 177 **consumption to fertilizer consumption and animal manure (c) in East Asia**  
 178 **during 2001–2017, North America, Europe, and the Globe during 1971–2017.**

179 Error bars represent SD. East Asia includes China, Japan, and Korea. North America  
 180 includes both USA and Canada. Europe includes Austria, Belgium, Bulgaria, Croatia,  
 181 Cyprus, Czechia, Denmark, Estonia, Finland, France, Germany, Greece, Hungary,  
 182 Ireland, Italy, Latvia, Lithuania, and Luxembourg. Data on energy consumption were  
 183 downloaded from<sup>27</sup>. Data on fertilizer consumption and animal manure were  
 184 downloaded from<sup>28</sup>.

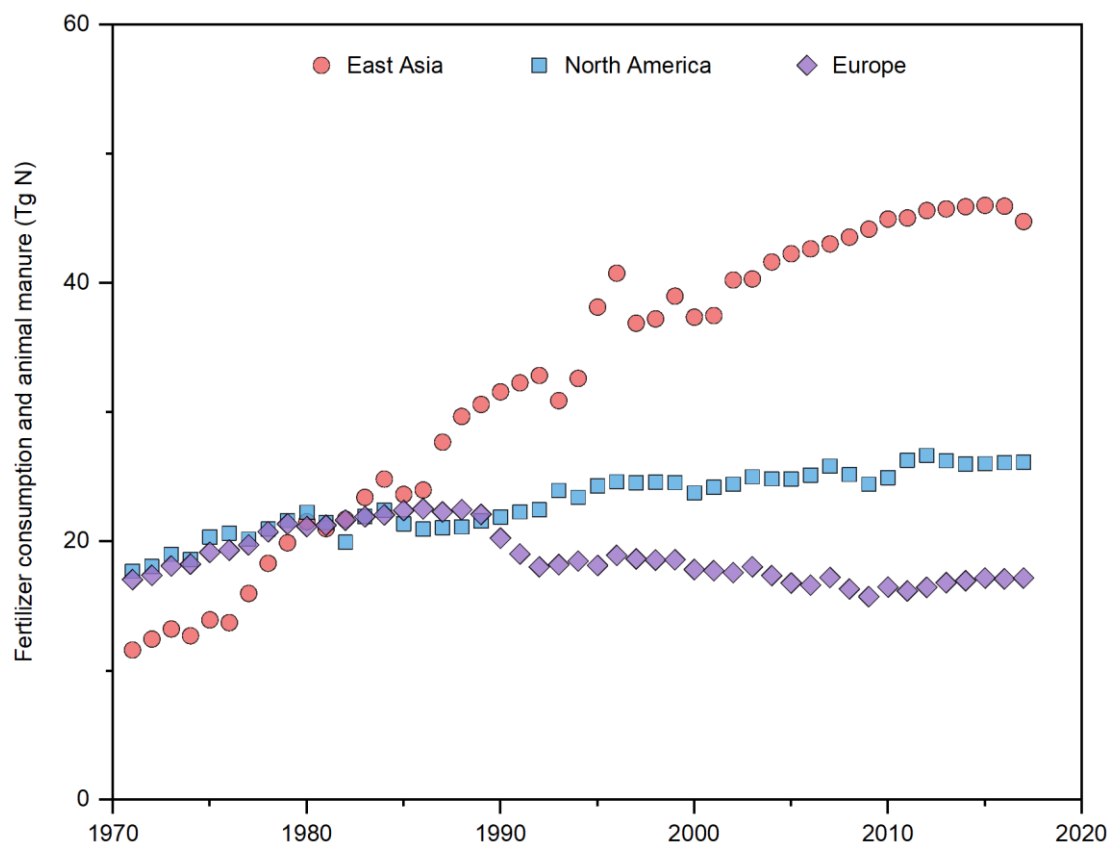

185

186 **Supplementary Fig. 16. Time series of fertilizer consumption and animal manure**  
 187 **in East Asia, North America, and Europe.** East Asia includes China, Japan, and  
 188 Korea. North America includes both USA and Canada. Europe includes Austria,  
 189 Belgium, Bulgaria, Croatia, Cyprus, Czechia, Denmark, Estonia, Finland, France,  
 190 Germany, Greece, Hungary, Ireland, Italy, Latvia, Lithuania, Luxembourg, Malta,  
 191 Netherlands, Poland, Portugal, Romania, Slovakia, Slovenia, Spain, Sweden, and  
 192 United Kingdom. Data were downloaded from<sup>28,29</sup>. The amount excreted in the  
 193 manure of Europe excludes Malta, Netherlands, Poland, Portugal, Romania, Slovakia,  
 194 Slovenia, Spain, Sweden, and the United Kingdom due to the lack of statistical data.

**Supplementary Table 1. Sources of volatilization NH<sub>3</sub> (v-NH<sub>3</sub>) and combustion-related NH<sub>3</sub> (c-NH<sub>3</sub>) in emission inventories.**

| <b>Regions / Countries</b>       | <b>v-NH<sub>3</sub> sources</b>                                                                                                                               | <b>c-NH<sub>3</sub> sources</b>                                                                                                                                                                                                                                                                                                                                                                       | <b>Refs.</b> |
|----------------------------------|---------------------------------------------------------------------------------------------------------------------------------------------------------------|-------------------------------------------------------------------------------------------------------------------------------------------------------------------------------------------------------------------------------------------------------------------------------------------------------------------------------------------------------------------------------------------------------|--------------|
| East Asia, North America, Europe | Manure management, manure in pasture or range or paddock, direct soil emissions, other indirect soil emissions, wastewater handling, and other waste handling | Public electricity and heat production, manufacturing industries and construction, other energy industries, road transportation, rail transportation, inland navigation, other transportation, residential and other sectors, fugitive emissions from solid fuels, production of other minerals, production of chemicals, agricultural waste burning, waste incineration, and other energy industries | 20           |
| East Asia                        | Non-combustion sources                                                                                                                                        | Primary coal, secondary coal, natural gas, other gas fuels, light oil fuels, diesel oil, heavy oil fuels, biofuel, other fuels, and cement kilns (only for Japan) combustion                                                                                                                                                                                                                          | 30           |
| East Asia                        | Agriculture                                                                                                                                                   | Power, industry, transportation, residential                                                                                                                                                                                                                                                                                                                                                          | 31           |
| East Asia                        | Fertilizer application, manure management, human perspiration and respiration, and latrines                                                                   | Combustion                                                                                                                                                                                                                                                                                                                                                                                            | 32           |
| Europe                           | Manure management and agriculture other                                                                                                                       | Public power, industry combustion, other station combustion, waste, public electricity and heat production, industry combustion, other stationary combustion, road transport, waste combustion, manure management                                                                                                                                                                                     | 33           |
| Europe                           | Agriculture                                                                                                                                                   | Energy supply, extractive industry, manufacturing and extractive industry, residential, commercial and institutional, transport, waste, and other                                                                                                                                                                                                                                                     | 34           |
| Europe                           | Manure, fertilizer, and oceanic sources                                                                                                                       | Biofuel, Transportation, industry, energy, and open-fire combustion                                                                                                                                                                                                                                                                                                                                   | 35           |
| USA                              | Miscellaneous                                                                                                                                                 | Fuel combustion electric generating utility, fuel combustion industrial and other, chemical and allied product mfg, metals processing, petroleum & related industries, other industrial processes, solvent utilization, storage and transport, waste disposal and recycling, highway vehicles, and off-highway vehicles                                                                               | 36           |

| <b>Regions / Countries</b> | <b>v-NH<sub>3</sub> sources</b>                                                                                 | <b>c-NH<sub>3</sub> sources</b>                                                                                                                                                                                                                                          | <b>Refs.</b> |
|----------------------------|-----------------------------------------------------------------------------------------------------------------|--------------------------------------------------------------------------------------------------------------------------------------------------------------------------------------------------------------------------------------------------------------------------|--------------|
| Canada                     | Animal production and crop production for Canada                                                                | Ore and mineral industries, oil and gas industry, electric power generation utilities, manufacturing, transportation and mobile equipment, agriculture-fuel use, commercial or residential or institutional, incineration and waste, paints and solvents, dust and fires | 37           |
| China                      | Synthetic fertilizer, agricultural soil, N-fixing crop, compost, livestock, human excrement, and waste disposal | Biomass burning, chemical industry, traffic, and NH <sub>3</sub> escape                                                                                                                                                                                                  | 38           |
| China                      | Synthetic fertilizer, agricultural soil, N-fixing crop, compost, livestock, human excrement, and waste disposal | Biomass burning, chemical industry, traffic, and NH <sub>3</sub> escape                                                                                                                                                                                                  | 39           |
| China                      | Cropland, livestock, grassland, aquaculture, waste disposal, humans, urban green land, and pets                 | Biomass burning, fuel combustion, chemical industry, and traffic sources                                                                                                                                                                                                 | 40           |
| China                      | Agriculture                                                                                                     | Power, industry, residential, transportation, solvent use                                                                                                                                                                                                                | 41           |
| China                      | Fertilizer application and livestock wastes                                                                     | Human and others                                                                                                                                                                                                                                                         | 42           |

196 Note: East Asia includes China, Japan, and Korea. North America includes USA and Canada. Europe includes Austria, Belgium,  
197 Bulgaria, Croatia, Cyprus, Czechia, Denmark, Estonia, Finland, France, Germany, Greece, Hungary, Ireland, Italy, Latvia, Lithuania,  
198 Luxembourg, Malta, Netherlands, Poland, Portugal, Romania, Slovakia, Slovenia, Spain, Sweden, and United Kingdom.

199 **Supplementary Table 2. Direct measurements on c-NH<sub>3</sub> and their influences on ambient NH<sub>3</sub>.** n.a. refers to ‘not available’.

| Methods                | Scales                 | Sources                | Data                          | Notes                                                                                                                                                                                                                                                                                                                   | Refs.  |
|------------------------|------------------------|------------------------|-------------------------------|-------------------------------------------------------------------------------------------------------------------------------------------------------------------------------------------------------------------------------------------------------------------------------------------------------------------------|--------|
| Laboratory simulations | Laboratory             | Biomass burning        | 19.3%                         | Fraction of NH <sub>3</sub> in total reactive N emitted during biomass burning. NH <sub>3</sub> is the most important active nitrogen emission after nitric oxide during biomass burning.                                                                                                                               | 43     |
| Laboratory simulations | Laboratory             | Vehicle exhausts       | 10 and 21 mg kg <sup>-1</sup> | Emission factors of diesel light-duty vehicles equipped with selective catalytic reduction at 23°C and -7°C, respectively, which were as high as those of gasoline light-duty vehicles and have long been overlooked by emission inventories. Diesel vehicles accounted for 52% of the total vehicle in Europe in 2015. | 44, 45 |
| Ground observations    | Site (Colorado, USA)   | Biomass burning        | 20 times                      | Multiple NH <sub>3</sub> concentrations during wildfire smoke-impacted periods relative to the non-fire period                                                                                                                                                                                                          | 46     |
| Ground observations    | Site (South Korea)     | Fossil-fuel combustion | 0.21–0.99 ppm                 | NH <sub>3</sub> concentrations emissions from bituminous coal power plants. NH <sub>3</sub> emission factor for bituminous coal power plants is 0.0029 kg NH <sub>3</sub> ton <sup>-1</sup> , which is ten times that of US EPA (0.00028 kg NH <sub>3</sub> ton <sup>-1</sup> )                                         | 47     |
| Ground observations    | Site (Shanghai, China) | Vehicle exhausts       | 3 times                       | Multiple NH <sub>3</sub> concentrations in the tunnel relative to that at a nearby urban site, indicate strong vehicle NH <sub>3</sub> emissions in the tunnel                                                                                                                                                          | 48     |
| Ground observations    | Site (California, USA) | Vehicle exhausts       | 10 times                      | Multiple NH <sub>3</sub> concentrations in the tunnel exit relative to that in the tunnel entrance                                                                                                                                                                                                                      | 49     |
| Ground observations    | Site (Shanghai, China) | Vehicle exhausts       | 5 and 11 times                | Multiple NH <sub>3</sub> concentrations in the tunnel exit relative to that in the tunnel entrance and the ambient air, respectively                                                                                                                                                                                    | 50     |

| Methods             | Scales                                | Sources           | Data                  | Notes                                                                                                                                                                                                                                                                                                                                                                                                                                                                 | Refs. |
|---------------------|---------------------------------------|-------------------|-----------------------|-----------------------------------------------------------------------------------------------------------------------------------------------------------------------------------------------------------------------------------------------------------------------------------------------------------------------------------------------------------------------------------------------------------------------------------------------------------------------|-------|
| Ground observations | Site (Eureka & Toronto, Canada)       | Biomass burning   | 2 times               | The observed NH <sub>3</sub> column concentration at Eureka doubled during the period of fire-affected from the 2014 Northwest Territories fires                                                                                                                                                                                                                                                                                                                      | 51    |
| Ground observations | Site (Rome, Italy)                    | Vehicle exhausts  | 5 times               | Multiple NH <sub>3</sub> concentration at the traffic sites relative to that at urban background site, there is a strong correlation between NH <sub>3</sub> and CO concentration                                                                                                                                                                                                                                                                                     | 52    |
| Ground observations | Site (Shanghai, China)                | c-NH <sub>3</sub> | 2 and 4 times         | Multiple hourly averaged NH <sub>3</sub> concentrations at the industrial site (19.6±8.2 ppb) in Shanghai relative to that at nearby rural (10.4±5.0 ppb) and urban (5.4±3.3 ppb) sites, respectively, during the same period. Remarkable high-frequency NH <sub>3</sub> variations were measured at the industrial site, with a concentration peak of 279.3 ppb and a highest hourly average of 84.9 ppb, indicating instantaneous nearby industrial emission peaks. | 53    |
| Ground observations | Site (China)                          | Miscellaneous     | 2–3 times             | Multiple NH <sub>3</sub> concentrations at urban sites relative to that at mountainous/forest/grassland/waterbody sites                                                                                                                                                                                                                                                                                                                                               | 54    |
| Ground observations | Site (Worldwide)                      | Miscellaneous     | 2 times               | Multiple NH <sub>4</sub> <sup>+</sup> deposition in urban areas relative to that in nearby rural areas                                                                                                                                                                                                                                                                                                                                                                | 55    |
| Ground observations | Site (New Jersey and California, USA) | Vehicle exhausts  | 0.029±0.005 ppbv/ppbv | The mean values of the on-road NH <sub>3</sub> :CO emission ratio, which was substantially higher than that in the National Emission Inventory (0.008-0.018 ppbv/ppbv)                                                                                                                                                                                                                                                                                                | 56    |
| Ground observations | City (Zurich, Tartu, Tallinn, Europe) | Vehicle exhausts  | 37%–94%               | The enhancement proportion of NH <sub>3</sub> concentration in the traffic areas in Zurich, Tartu, and Tallinn, three Europe cities, over the average background concentrations.                                                                                                                                                                                                                                                                                      | 57    |

| Methods                                                          | Scales         | Sources           | Data                      | Notes                                                                                                                                                                                                                                                                                                                                                                                       | Refs. |
|------------------------------------------------------------------|----------------|-------------------|---------------------------|---------------------------------------------------------------------------------------------------------------------------------------------------------------------------------------------------------------------------------------------------------------------------------------------------------------------------------------------------------------------------------------------|-------|
| Aircraft observations                                            | Regional (USA) | Biomass burning   | 66%                       | Fraction of NH <sub>3</sub> in total reactive N emitted from wildfires. NH <sub>x</sub> emission factors in temperate forest fires in the US were about 2.5 times higher than the best estimated temperate forest emission factor used in models                                                                                                                                            | 58    |
| Satellite observation                                            | Global         | Point sources     | 4.6 Tg N yr <sup>-1</sup> | Total NH <sub>3</sub> emission, which is about ~2.5 times more than the current amount in the Hemispheric Transport Atmospheric Pollution version 2 (HTAPv2) emission inventory (2.1 Tg yr <sup>-1</sup> )                                                                                                                                                                                  | 59    |
| Satellite observations & oversampling techniques                 | Global         | c-NH <sub>3</sub> | 158 hotspots              | A high-resolution map of atmospheric NH <sub>3</sub> showed the hotspots of c-NH <sub>3</sub> emissions, including burning coal mines and coal-related industries: coal mining, thermal power plants, coke production, and other chemical coal industries                                                                                                                                   | 60    |
| Satellite observation & wind-adjusted super-resolution technique | Global         | c-NH <sub>3</sub> | >500                      | Amount of NH <sub>3</sub> point sources, including 266 industrial NH <sub>3</sub> hotspots and 13 urban NH <sub>3</sub> hotspots in African megacities                                                                                                                                                                                                                                      | 61    |
| Satellite observation                                            | Global         | Biomass burning   | n.a.                      | Biomass burning controls the seasonal surface NH <sub>3</sub> concentrations in the Southern Hemisphere with frequent fires, such as in Africa north of the Equator, Africa south of the Equator, and central South America, and also affect the temporal variation of surface NH <sub>3</sub> concentrations in high NH <sub>3</sub> concentration regions, such as China, USA, and Europe | 62    |

| Methods               | Scales                              | Sources                               | Data       | Notes                                                                                                                                                                                                                                                                                                                                                                | Refs. |
|-----------------------|-------------------------------------|---------------------------------------|------------|----------------------------------------------------------------------------------------------------------------------------------------------------------------------------------------------------------------------------------------------------------------------------------------------------------------------------------------------------------------------|-------|
| Satellite observation | Regional (Alberta, Canada)          | Biomass burning                       | 30 Gg      | The satellite-measured NH <sub>3</sub> emissions during the Horse River fire, accounted for 20% of total anthropogenic emissions in Alberta, Canada                                                                                                                                                                                                                  | 63    |
| Satellite observation | Global                              | Biomass burning                       | n.a.       | Some high-latitude regions during peak forest fire activity often have NH <sub>3</sub> concentrations approaching those in agricultural hotspots                                                                                                                                                                                                                     | 25    |
| Emission inventory    | City (Shanghai, China)              | Vehicle exhausts                      | 12%        | Fraction of vehicle NH <sub>3</sub> emissions in total NH <sub>3</sub> emissions in Shanghai, China                                                                                                                                                                                                                                                                  | 50    |
| Emission inventory    | Regional (Pearl River Delta, China) | Vehicle exhausts                      | 8.1%–19%   | Fraction of on-road vehicle NH <sub>3</sub> emissions in total NH <sub>3</sub> emissions in the Pearl River Delta of China, which increased from 8.1% in 2006 to 18.8% in 2012 due to the increase in vehicle population                                                                                                                                             | 64    |
| Emission inventory    | National (UK)                       | Vehicle exhausts                      | 17 and 2.6 | Factors of underestimation vehicle NH <sub>3</sub> emissions in urban and national scales compared with the 2018 UK National Atmospheric Emissions Inventory, respectively                                                                                                                                                                                           | 65    |
| Emission inventory    | National (USA)                      | Vehicle exhausts                      | 7%         | Fraction of vehicle NH <sub>3</sub> emissions in total NH <sub>3</sub> emissions in the USA using the error-weighted average emission ratios of NH <sub>3</sub> :CO <sub>2</sub>                                                                                                                                                                                     | 66    |
| Emission inventory    | Global                              | Transportation                        | 1.3 Tg N   | NH <sub>3</sub> emissions from transportation in 2010 using updated emission factors, which was 3.2 times that of EDGAR                                                                                                                                                                                                                                              | 67    |
| Emission inventory    | National (China)                    | Household coal and biomass combustion | 0.5 Tg N   | NH <sub>3</sub> emission from household coal and biomass combustion in China in 2006, using the average NH <sub>3</sub> emission factors for burning coal (1.01 mg g <sup>-1</sup> ), biomass briquette (0.95 mg g <sup>-1</sup> ), and biomass (0.96 mg g <sup>-1</sup> ) in a traditional heating stove as well as the consumption of residential coal and biomass | 68    |



| <b>Methods</b>                          | <b>Scales</b>    | <b>Sources</b>    | <b>Data</b>                                 | <b>Notes</b>                                                                                                                                                               | <b>Refs.</b> |
|-----------------------------------------|------------------|-------------------|---------------------------------------------|----------------------------------------------------------------------------------------------------------------------------------------------------------------------------|--------------|
| Emission inventory                      | Global           | Biomass burning   | 5.9 Tg N yr <sup>-1</sup>                   | NH <sub>3</sub> emissions from biomass burning, which account for 11% of global total NH <sub>3</sub> emissions                                                            | 69           |
| Emission inventory                      | Global           | Biomass burning   | 8.2 Tg N yr <sup>-1</sup>                   | NH <sub>3</sub> emissions from biomass burning based on the updated compilation of emission factors for 121 biomass species and published global activity data             | 70           |
| Coupled human-environment N cycle model | National (China) | c-NH <sub>3</sub> | >100 kg N ha <sup>-1</sup> yr <sup>-1</sup> | The emission intensities based on coupled human-environment N cycle model are higher than that of v-NH <sub>3</sub> sources (0–80 kg N ha <sup>-1</sup> yr <sup>-1</sup> ) | 71           |

201 **Supplementary Table 3. Values of kinetic and equilibrium isotope effects ( $\epsilon_k$  and  $\epsilon_{eq}$ , respectively) in the gaseous  $\text{NH}_3$**   
 202 **conversion to particulate  $\text{NH}_4^+$  (p- $\text{NH}_4^+$ ) in the atmosphere. n.a. refers to ‘not available’.**

| Isotope effects                                       | Mean $\pm$ SD values (‰) | Methods                                                                                                                             | Refs. |
|-------------------------------------------------------|--------------------------|-------------------------------------------------------------------------------------------------------------------------------------|-------|
| Kinetic isotope fractionation ( $\epsilon_k$ )        | -28.0 $\pm$ n.a.         | Calculations based on constant diffusion rates of $^{15}\text{NH}_3$ relative to $^{14}\text{NH}_3$ in the nonturbulent environment | 72    |
|                                                       | -17.7 $\pm$ n.a.         | Calculations based on different diffusion rates of $^{15}\text{NH}_3$ relative to $^{14}\text{NH}_3$ in the turbulent environment   | 1,3   |
|                                                       | -15.4 $\pm$ 3.5          | Determined by field $\delta^{15}\text{N}$ differences between actively and passively sampled $\text{NH}_3$ in the summer            | 1     |
|                                                       | -15.5 $\pm$ 1.0          | Determined by field $\delta^{15}\text{N}$ differences between actively and passively sampled $\text{NH}_3$ in the winter            | 3     |
|                                                       | -20.0 $\pm$ n.a.         | Determined by $\delta^{15}\text{N}$ differences between $\text{NH}_3$ and p- $\text{NH}_4^+$ in controlling experiments             | 73    |
| Equilibrium isotope fractionation ( $\epsilon_{eq}$ ) | 31.0 $\pm$ 4.0           | Theoretical calculations at 20°C                                                                                                    | 74    |
|                                                       | 35.0 $\pm$ n.a.          | Theoretical calculations at 25°C                                                                                                    | 75    |
|                                                       | 33.0 $\pm$ n.a.          | Controlling experiments in a closed chamber                                                                                         | 73    |
|                                                       | 31.6 $\pm$ 2.0           | Controlling experiments in a dynamic chamber with a turnover rate of 0.9 times per day                                              | 76    |
|                                                       | 24.0 $\pm$ 3.0           | Controlling experiments in a dynamic chamber with a turnover rate of 6.8 times per day                                              | 76    |

203

204 **Supplementary Table 4. Simultaneously site-based  $\delta^{15}\text{N}_{\text{a-NH}_3}$ ,  $\delta^{15}\text{N}_{\text{p-NH}_4^+}$ , and  $\delta^{15}\text{N}_{\text{w-NH}_4^+}$  used for calculating differences**  
 205 **between the paired  $\delta^{15}\text{N}_{\text{i-NH}_3(\text{a-NH}_3)}$ ,  $\delta^{15}\text{N}_{\text{i-NH}_3(\text{p-NH}_4^+)}$ , or  $\delta^{15}\text{N}_{\text{i-NH}_3(\text{w-NH}_4^+)}$ .** n represents replicate measurements at each site. n.a. refers  
 206 to 'not available'. <sup>a</sup> the  $\delta^{15}\text{N}_{\text{a-NH}_3}$  values based on the passive samplers have been corrected by adding 15‰<sup>1-3</sup>.

| Site, Country    | Longitude | Latitude | $\delta^{15}\text{N}_{\text{a-NH}_3}$ (‰) | $\delta^{15}\text{N}_{\text{p-NH}_4^+}$ (‰) | $\delta^{15}\text{N}_{\text{w-NH}_4^+}$ (‰) | Refs. |
|------------------|-----------|----------|-------------------------------------------|---------------------------------------------|---------------------------------------------|-------|
| Suzhou, China    | 120°35' E | 31°17' N | -16.7±3.3 (n=12)                          | 15.8±3.8 (n=12)                             | 0.5±2.8 (n=12)                              | 6     |
| Changshu, China  | 120°42' E | 31°21' N | -18.3±6.0 (n=12)                          | 15.1±7.3 (n=12)                             | -4.9±3.1 (n=12)                             | 6     |
| Yixing, China    | 119°54' E | 31°17' N | -17.5±6.0 (n=12)                          | 14.3±9.7 (n=12)                             | 0.5±2.8 (n=12)                              | 6     |
| Beijing, China   | 116°22' E | 39°58' N | -15.9±5.8 <sup>a</sup> (n=16)             | 5.5±5.2 (n=26)                              | 0.7±4.2 (n=28)                              | 77-79 |
| Colorado, USA    | 105°16' W | 39°58' N | -10.0±2.6 (n=6)                           | 5.6±5.5 (n=13)                              | -1.4±3.5 (n=11)                             | 80,81 |
| Providence, USA  | 71°24' W  | 41°49' N | -16.9±3.8 (n=12)                          | 4.3±4.7 (n=14)                              | n.a.                                        | 74    |
| Yurihonjo, Japan | 140°24' E | 39°12' N | -16.9±8.8 (n=20)                          | 16.1±6.6 (n=77)                             | n.a.                                        | 13    |
| Niigata, Japan   | 138°51' E | 37°48' N | -8.3±3.6 (n=19)                           | 22.1±8.3 (n=19)                             | n.a.                                        | 82    |

207 **Supplementary Table 5. Simultaneously seasonal observed  $C_{a-NH_3}$ ,  $C_{p-NH_4^+}$ ,  $\delta^{15}N_{a-NH_3}$ ,  $\delta^{15}N_{p-NH_4^+}$ , and  $\delta^{15}N_{w-NH_4^+}$  used for**  
 208 **calculating  $\delta^{15}N_{i-NH_3}$ ,  $^{15}\Delta_{a-NH_3}$ ,  $^{15}\Delta_{p-NH_4^+}$ , and  $^{15}\Delta_{w-NH_4^+}$  values (Eqs. (7–11)).  $n$  represents replicate measurements at each site. n.a.**  
 209 **refers to ‘not available’. <sup>a</sup> the  $\delta^{15}N_{a-NH_3}$  based on the passive samplers has been corrected by adding 15‰<sup>1–3</sup>.**

| Site, Country   | Longitude | Latitude | Season | $\delta^{15}N_{a-NH_3}$<br>(‰) | $\delta^{15}N_{p-NH_4^+}$<br>(‰) | $\delta^{15}N_{w-NH_4^+}$<br>(‰) | $C_{a-NH_3}$<br>( $\mu\text{g N m}^{-3}$ ) | $C_{p-NH_4^+}$<br>( $\mu\text{g N m}^{-3}$ ) | Refs. |
|-----------------|-----------|----------|--------|--------------------------------|----------------------------------|----------------------------------|--------------------------------------------|----------------------------------------------|-------|
| Suzhou, China   | 120°35' E | 31°17' N | Spring | -16.3±9.3<br>(n=3)             | 29.2±4.5<br>(n=3)                | 1.6±0.6<br>(n=3)                 | 11.5±5.5<br>(n=3)                          | 4.2±0.7<br>(n=3)                             | 6     |
| Suzhou, China   | 120°35' E | 31°17' N | Summer | -22.7±0.4<br>(n=3)             | 9.7±4.8<br>(n=3)                 | -0.8±1.9<br>(n=3)                | 18.0±4.1<br>(n=3)                          | 5.8±0.8<br>(n=3)                             | 6     |
| Suzhou, China   | 120°35' E | 31°17' N | Autumn | -18.3±4.7<br>(n=3)             | 16.1±11.2<br>(n=3)               | -2.2±2.6<br>(n=3)                | 11.6±5.7<br>(n=3)                          | 2.0±1.4<br>(n=3)                             | 6     |
| Suzhou, China   | 120°35' E | 31°17' N | Winter | -9.6±4.1<br>(n=3)              | 8.2±9.9<br>(n=3)                 | 3.4±2.4<br>(n=3)                 | 4.5±1.6<br>(n=3)                           | 9.0±2.5<br>(n=3)                             | 6     |
| Changshu, China | 120°42' E | 31°21' N | Spring | -15.6±8.4<br>(n=3)             | 23.8±4.3<br>(n=3)                | -2.9±1.6<br>(n=3)                | 11.4±6.1<br>(n=3)                          | 6.2±1.3<br>(n=3)                             | 6     |
| Changshu, China | 120°42' E | 31°21' N | Summer | -21.6±0.9<br>(n=3)             | 12.1±2.5<br>(n=3)                | -7.4±0.6<br>(n=3)                | 19.8±4.5<br>(n=3)                          | 5.9±2.2<br>(n=3)                             | 6     |
| Changshu, China | 120°42' E | 31°21' N | Autumn | -19.6±3.2<br>(n=3)             | 16.3±4.3<br>(n=3)                | -8.0±1.4<br>(n=3)                | 14.3±3.7<br>(n=3)                          | 4.6±2.6<br>(n=3)                             | 61    |
| Changshu, China | 120°42' E | 31°21' N | Winter | -16.2±8.8<br>(n=3)             | 8.3±7.4<br>(n=3)                 | -1.5±0.5<br>(n=3)                | 5.8±2.7<br>(n=3)                           | 8.9±9.2<br>(n=3)                             | 6     |
| Yixing, China   | 119°54' E | 31°17' N | Spring | -17.2±7.3<br>(n=3)             | 27.1±4.1<br>(n=3)                | 1.6±0.6<br>(n=3)                 | 13.0±7.1<br>(n=3)                          | 3.4±1.0<br>(n=3)                             | 6     |
| Yixing, China   | 119°54' E | 31°17' N | Summer | -20.9±3.0<br>(n=3)             | 14.6±7.9<br>(n=3)                | -0.9±1.9<br>(n=3)                | 18.0±4.2<br>(n=3)                          | 8.6±5.9<br>(n=3)                             | 6     |

| Site, Country    | Longitude | Latitude | Season | $\delta^{15}\text{N}_{\text{a-NH}_3}$<br>(‰) | $\delta^{15}\text{N}_{\text{p-NH}_4^+}$<br>(‰) | $\delta^{15}\text{N}_{\text{w-NH}_4^+}$<br>(‰) | $C_{\text{a-NH}_3}$<br>( $\mu\text{g N m}^{-3}$ ) | $C_{\text{p-NH}_4^+}$<br>( $\mu\text{g N m}^{-3}$ ) | Refs. |
|------------------|-----------|----------|--------|----------------------------------------------|------------------------------------------------|------------------------------------------------|---------------------------------------------------|-----------------------------------------------------|-------|
| Yixing, China    | 119°54' E | 31°17' N | Autumn | -18.8±2.8<br>(n=3)                           | 9.0±7.3<br>(n=3)                               | -2.2±2.5<br>(n=3)                              | 13.6±4.2<br>(n=3)                                 | 4.6±4.1<br>(n=3)                                    | 6     |
| Yixing, China    | 119°54' E | 31°17' N | Winter | -12.9±8.6<br>(n=3)                           | 6.4±2.6<br>(n=3)                               | 3.3±2.3<br>(n=3)                               | 5.5±0.7<br>(n=3)                                  | 10.1±7.3<br>(n=3)                                   | 6     |
| Beijing, China   | 116°22' E | 39°58' N | Summer | -13.7±4.2 <sup>a</sup><br>(n=12)             | 6.0±5.5<br>(n=17)                              | 1.3±4.0<br>(n=21)                              | 15.5±n.a.<br>(n=1)                                | 1.2±1.1<br>(n=17)                                   | 77-79 |
| Beijing, China   | 116°22' E | 39°58' N | Autumn | -20.6±7.0 <sup>a</sup><br>(n=8)              | 4.6±4.7<br>(n=9)                               | 2.2±n.a.<br>(n=1)                              | 10.6±n.a.<br>(n=1)                                | 0.9±0.8<br>(n=9)                                    | 77-79 |
| Yurihonjo, Japan | 140°24' E | 39°12' N | Spring | -20.8±8.4<br>(n=5)                           | 15.3±5.1<br>(n=9)                              | -6.1±2.5<br>(n=4)                              | 4.4±2.5<br>(n=5)                                  | 0.4±0.3<br>(n=9)                                    | 13,83 |
| Yurihonjo, Japan | 140°24' E | 39°12' N | Summer | -16.7±6.5<br>(n=5)                           | 18.0±7.0<br>(n=9)                              | -5.0±1.8<br>(n=6)                              | 4.5±3.3<br>(n=5)                                  | 0.3±0.3<br>(n=9)                                    | 13,83 |
| Yurihonjo, Japan | 140°24' E | 39°12' N | Autumn | -8.1±4.5<br>(n=5)                            | 18.8±5.3<br>(n=7)                              | -2.5±0.7<br>(n=6)                              | 1.2±0.4<br>(n=5)                                  | 0.2±0.2<br>(n=7)                                    | 13,83 |
| Yurihonjo, Japan | 140°24' E | 39°12' N | Winter | -23.9±6.7<br>(n=5)                           | 11.7±7.0<br>(n=8)                              | -4.5±0.9<br>(n=3)                              | 1.5±1.2<br>(n=5)                                  | 0.3±0.2<br>(n=8)                                    | 13,83 |
| Colorado, USA    | 105°16' W | 39°58' N | Summer | -10.0±2.6<br>(n=6)                           | 5.6±5.5<br>(n=13)                              | -1.4±3.5<br>(n=11)                             | 0.2±n.a.<br>(n=1)                                 | 0.2±0.2<br>(n=5)                                    | 80,81 |

## 210 **Supplementary References**

- 211 1. Pan, Y. P. et al. Systematic low bias of passive samplers in characterizing nitrogen  
212 isotopic composition of atmospheric ammonia. *Atmos. Res.* **243**, 105018 (2020).
- 213 2. Kawashima, H., Ogata, R. & Gunji, T. Laboratory-based validation of a passive  
214 sampler for determination of the nitrogen stable isotope ratio of ammonia gas. *Atmos.*  
215 *Environ.* **245**, 118009 (2021).
- 216 3. Walters, W. W. et al. Characterizing the spatiotemporal nitrogen stable isotopic  
217 composition of ammonia in vehicle plumes. *Atmos. Chem. Phys.* **20**, 11551–11567  
218 (2020).
- 219 4. Felix, J. D. et al. Examining the transport of ammonia emissions across landscapes  
220 using nitrogen isotope ratios. *Atmos. Environ.* **95**, 563–570 (2014).
- 221 5. Felix, J. D., Elliott, E. M., Gish, T. J., McConnell, L. L. & Shaw, S. L. Characterizing  
222 the isotopic composition of atmospheric ammonia emission sources using passive  
223 samplers and a combined oxidation-bacterial denitrifier approach. *Rapid Commun.*  
224 *Mass Sp.* **27**, 2239–2246 (2013).
- 225 6. Ti, C. P. et al. Isotopic characterization of NH<sub>x</sub>-N in deposition and major emission  
226 sources. *Biogeochemistry* **138**, 85–102 (2018).
- 227 7. Ti, C. P. et al. Changes of δ<sup>15</sup>N values during the volatilization process after applying  
228 urea on soil. *Environ. Pollut.* **270**, 116204 (2020).
- 229 8. Meng, D. Y. Ammonia emission and ammonia nitrogen isotope characteristics of  
230 typical agricultural and urban volatile sources. Master Thesis, Nanjing University of  
231 Information Science and Technology. (2021). (in Chinese with English abstract).
- 232 9. Chang, Y. H., Liu, X. J., Deng, C. R., Dore, A. J. & Zhuang, G. S. Source  
233 apportionment of atmospheric ammonia before, during, and after the 2014 APEC  
234 summit in Beijing using stable nitrogen isotope signatures. *Atmos. Chem. Phys.* **16**,  
235 11635–11647 (2016).
- 236 10. Freyer, H. D. Seasonal trends of NH<sub>4</sub><sup>+</sup> and NO<sub>3</sub><sup>-</sup> nitrogen isotope composition in rain  
237 collected at Jülich, Germany. *Tellus B.* **30**, 83–92 (1978).
- 238 11. Heaton, T. H. E. <sup>15</sup>N/<sup>14</sup>N ratios of nitrate and ammonium in rain at Pretoria, South  
239 Africa. *Atmos. Environ.* **21**, 843–852 (1987).
- 240 12. Hristov, A. N. et al. Nitrogen losses from dairy manure estimated through nitrogen  
241 mass balance and chemical markers. *J. Environ. Qual.* **38**, 2438–2448 (2009).
- 242 13. Kawashima, H. Seasonal trends of the stable nitrogen isotope ratio in particulate  
243 nitrogen compounds and their gaseous precursors in Akita, Japan. *Tellus B.* **71**,  
244 1627846 (2019).
- 245 14. Lee, C., Hristov, A. N., Cassidy, T. & Heyler, K. Nitrogen isotope fractionation and  
246 origin of ammonia nitrogen volatilized from cattle manure in simulated storage.  
247 *Atmosphere* **2**, 256–270 (2011).
- 248 15. Shao, S. C. et al. Online characterization of a large but overlooked human excreta  
249 source of ammonia in China's urban atmosphere. *Atmos. Environ.* **230**, 117459

- 250 (2020).
- 251 16. Lv, X. M. Reactive nitrogen composition from typical sources and sources  
252 apportionment of urban atmospheric ammonia using nitrogen isotope. Master Thesis,  
253 Shandong University. (2021). (in Chinese with English abstract).
- 254 17. Song, L. L. et al.  $^{15}\text{N}$  natural abundance of vehicular exhaust ammonia, quantified by  
255 active sampling techniques. *Atmos. Environ.* **255**, 118430 (2021).
- 256 18. Kawashima, H. & Kurahashi, T. Inorganic ion and nitrogen isotopic compositions of  
257 atmospheric aerosols at Yurihonjo, Japan: Implications for nitrogen sources. *Atmos.*  
258 *Environ.* **45**, 6309–6316 (2011).
- 259 19. Xiao, H. W. et al. Enhanced biomass burning as a source of aerosol ammonium over  
260 cities in Central China in autumn. *Environ. Pollut.* **266**, 115278 (2020).
- 261 20. Emissions Database for Global Atmospheric Research (EDGAR). Data were  
262 downloaded from <https://edgar.jrc.ec.europa.eu/overview.php?v=431> (accessed on  
263 16 October 2020) (2016).
- 264 21. Holland, E. A., Braswell, B. H., Sulzman, J. & Lamarque, J. F. Nitrogen deposition  
265 onto the United States and western Europe: Synthesis of observations and models.  
266 *Ecol. Appl.* **15**, 38–57 (2005).
- 267 22. Xu, W. et al. Quantifying atmospheric nitrogen deposition through a nationwide  
268 monitoring network across China. *Atmos. Chem. Phys.* **15**, 12345–12360 (2015).
- 269 23. Li, Y. et al. Increasing importance of deposition of reduced nitrogen in the United  
270 States. *Proc. Natl Acad. Sci. USA* **113**, 5874–5879 (2016).
- 271 24. Yu, G. R. et al. Stabilization of atmospheric nitrogen deposition in China over the  
272 past decade. *Nat. Geosci.* **12**, 424–429 (2019).
- 273 25. Shephard, M. W. et al. Ammonia measurements from space with the Cross-track  
274 Infrared Sounder: characteristics and applications. *Atmos. Chem. Phys.* **20**, 2277–  
275 2302 (2020).
- 276 26. Wen, Z. et al. Changes of nitrogen deposition in China from 1980 to 2018. *Environ.*  
277 *Int.* **144**, 106022 (2020).
- 278 27. Statistical Review of World Energy. Data were downloaded from  
279 [https://www.bp.com/en/global/corporate/energy-economics/statistical-review-of-](https://www.bp.com/en/global/corporate/energy-economics/statistical-review-of-world-energy/downloads.html)  
280 [world-energy/downloads.html](https://www.bp.com/en/global/corporate/energy-economics/statistical-review-of-world-energy/downloads.html) (accessed on 28 June 2020) (2020).
- 281 28. Food and Agriculture Data. Data were downloaded from  
282 [Http://www.fao.org/faostat/en/#data](http://www.fao.org/faostat/en/#data) (accessed on 26 November 2019) (2019).
- 283 29. Organisation for Economic Co-operation and Development. Data were downloaded  
284 from [Https://stats.oecd.org/Index.aspx?datasetcode](https://stats.oecd.org/Index.aspx?datasetcode) (accessed on 12 June 2020)  
285 (2019).
- 286 30. Regional Emission inventory in ASia version 3.2 (REAS). Data were downloaded  
287 from <http://www.nies.go.jp/REAS> (accessed on 31 October 2020) (2020).
- 288 31. Li, M. et al. MIX: a mosaic Asian anthropogenic emission inventory under the  
289 international collaboration framework of the MICS-Asia and HTAP. *Atmos. Chem.*

- 290 *Phys.* **17**, 935–963 (2017).
- 291 32. Kurokawa, J. et al. Emissions of air pollutants and greenhouse gases over Asian  
292 regions during 2000–2008: Regional Emission inventory in ASia (REAS) version 2.  
293 *Atmos. Chem. Phys.* **13**, 11019–11058 (2013).
- 294 33. Fagerli H. EMEP-Status Report 1/2020-Transboundary particulate matter, photo-  
295 oxidants, acidifying and eutrophying components, Norwegian Meteorological  
296 Institute (2020).
- 297 34. National Emission Ceilings Directive (NECD) emissions data viewer 1990–2018.  
298 Data were downloaded from [https://www.eea.europa.eu/data-and-](https://www.eea.europa.eu/data-and-maps/dashboards/necd-directive-data-viewer-3)  
299 [maps/dashboards/necd-directive-data-viewer-3](https://www.eea.europa.eu/data-and-maps/dashboards/necd-directive-data-viewer-3) (accessed on 12 June 2020) (2020).
- 300 35. Paulot, F. et al. Ammonia emissions in the United States, European Union, and  
301 China derived by high-resolution inversion of ammonium wet deposition data:  
302 Interpretation with a new agricultural emissions inventory (MASAGE\_NH3). *J.*  
303 *Geophys. Res. Atmos.* **119**, 4343–4364 (2014).
- 304 36. Air Pollutant Emissions Trends Data (APETD). Data were downloaded from  
305 <https://www.epa.gov/air-emissions-inventories/air-pollutant-emissions-trends-data>  
306 (accessed on 12 June 2020) (2020).
- 307 37. Air Pollutants Emissions Inventory (APEI) online search. Data were downloaded  
308 from <https://pollution-waste.canada.ca/air-emission-inventory> (accessed on 12 June  
309 2020) (2020).
- 310 38. Kang, Y. N. et al. High-resolution ammonia emissions inventories in China from  
311 1980 to 2012. *Atmos. Chem. Phys.* **16**, 2043–2058 (2016).
- 312 39. Huang, X. et al. A high-resolution ammonia emission inventory in China. *Global*  
313 *Biogeochem. Cy.* **26**, GB1030 (2012).
- 314 40. Zhang, X. M. et al. Ammonia emissions may be substantially underestimated in  
315 China. *Environ. Sci. Technol.* **51**, 12089–12096 (2017).
- 316 41. Zheng, B. et al. Trends in China's anthropogenic emissions since 2010 as the  
317 consequence of clean air actions. *Atmos. Chem. Phys.* **18**, 14095–14111 (2018).
- 318 42. Zhang, L. et al. Agricultural ammonia emissions in China: reconciling bottom-up and  
319 top-down estimates. *Atmos. Chem. Phys.* **18**, 339–355 (2018).
- 320 43. Roberts, J. M. et al. The nitrogen budget of laboratory-simulated western US  
321 wildfires during the FIREX 2016 Fire Lab study. *Atmos. Chem. Phys.* **20**, 8807–8826  
322 (2020).
- 323 44. Suarez-Bertoa, R. & Astorga, C. Isocyanic acid and ammonia in vehicle emissions.  
324 *Transport. Res. Part D-Tr. E.* **49**, 259–270 (2016).
- 325 45. World Vehicles in Use. Data were downloaded from [Https://www.statista.com](https://www.statista.com)  
326 (accessed on 10 November 2021) (2019).
- 327 46. Benedict, K. B. et al. Enhanced concentrations of reactive nitrogen species in  
328 wildfire smoke. *Atmos. Environ.* **148**, 8–15 (2017).
- 329 47. Kang, S., Kim, S. D. & Jeon, E. C. Emission characteristics of ammonia at



- 330 bituminous coal power plant. *Energies* **13**, 1534 (2020).
- 331 48. Wang, R. et al. Characteristics of atmospheric ammonia and its relationship with  
332 vehicle emissions in a megacity in China. *Atmos. Environ.* **182**, 97–104 (2018).
- 333 49. Kean, A. J. & Harley, R. A. On-road measurement of ammonia and other motor  
334 vehicle exhaust emissions. *Environ. Sci. Technol.* **34**, 3535–3539 (2000).
- 335 50. Chang, Y. H. et al. The importance of vehicle emissions as a source of atmospheric  
336 ammonia in the megacity of Shanghai. *Atmos. Chem. Phys.* **16**, 3577–3594 (2016).
- 337 51. Lutsch, E., Damers, E., Conway, S. & Strong, K. Long-range transport of NH<sub>3</sub>, CO,  
338 HCN, and C<sub>2</sub>H<sub>6</sub> from the 2014 Canadian Wildfires. *Geophys. Res. Lett.* **43**, 8286–  
339 8297 (2016).
- 340 52. Perrino, C., Catrambone, M., Di Menno Di Bucchianico, A. & Allegrini, I. Gaseous  
341 ammonia in the urban area of Rome, Italy and its relationship with traffic emissions.  
342 *Atmos. Environ.* **36**, 5385–5394 (2002).
- 343 53. Wang, S. S. et al. Atmospheric ammonia and its impacts on regional air quality over  
344 the megacity of Shanghai, China. *Sci. Rep.* **5**, 15842 (2015).
- 345 54. Pan, Y. P. et al. Identifying ammonia hotspots in China using a national observation  
346 network. *Environ. Sci. Technol.* **52**, 3926–3934 (2018).
- 347 55. Decina, S. M., Hutrya, L. R. & Templer, P. H. Hotspots of nitrogen deposition in the  
348 world's urban areas: a global data synthesis. *Front. Ecol. Environ.* **18**, 92–100 (2020).
- 349 56. Sun, K., Tao, L., Miller, D. J., Khan, M. A. & Zondlo, M. A. On-road ammonia  
350 emissions characterized by mobile, open-path measurements. *Environ. Sci. Technol.*  
351 **48**, 3943–3950 (2014).
- 352 57. Elser, M. et al. High contributions of vehicular emissions to ammonia in three  
353 European cities derived from mobile measurements. *Atmos. Environ.* **175**, 210–220  
354 (2018).
- 355 58. Lindaas, J. et al. Emissions of reactive nitrogen from western U.S. wildfires during  
356 summer 2018. *J. Geophys. Res. Atmos.* **126**, e2020JD032657 (2020).
- 357 59. Damers, E. et al. NH<sub>3</sub> emissions from large point sources derived from CrIS and  
358 IASI satellite observations. *Atmos. Chem. Phys.* **19**, 12261–12293 (2019).
- 359 60. Van Damme, M. et al. Industrial and agricultural ammonia point sources exposed.  
360 *Nature* **564**, 99–103 (2018).
- 361 61. Clarisse, L., Van Damme, M., Clerbaux, C. & Coheur, P. F. Tracking down global  
362 NH<sub>3</sub> point sources with wind-adjusted superresolution. *Atmos. Meas. Tech.* **12**, 5457–  
363 5473 (2019).
- 364 62. Liu, L. et al. Estimating global surface ammonia concentrations inferred from  
365 satellite retrievals. *Atmos. Chem. Phys.* **19**, 12051–12066 (2019).
- 366 63. Adams, C. et al. Satellite-derived emissions of carbon monoxide, ammonia, and  
367 nitrogen dioxide from the 2016 Horse River wildfire in the Fort McMurray area.  
368 *Atmos. Chem. Phys.* **19**, 2577–2599 (2019).

- 369 64. Liu, T. Y. et al. Emission factor of ammonia (NH<sub>3</sub>) from on-road vehicles in China:  
370 tunnel tests in urban Guangzhou. *Environ. Res. Lett.* **9**, 064027 (2014).
- 371 65. Farren, N. J., Davison, J., Rose, R. A., Wagner, R. L. & Carslaw, D. C.  
372 Underestimated ammonia emissions from road vehicles. *Environ. Sci. Technol.* **54**,  
373 15689–15697 (2020).
- 374 66. Sun, K. et al. Vehicle emissions as an important urban ammonia source in the United  
375 States and China. *Environ. Sci. Technol.* **51**, 2472–2481 (2017).
- 376 67. Meng, W. J. et al. Improvement of a global high-resolution ammonia emission  
377 inventory for combustion and industrial sources with new data from the residential  
378 and transportation sectors. *Environ. Sci. Technol.* **51**, 2821–2829 (2017).
- 379 68. Li, Q. et al. Gaseous ammonia emissions from coal and biomass combustion in  
380 household stoves with different combustion efficiencies. *Environ. Sci. Technol. Lett.*  
381 **3**, 98–103 (2016).
- 382 69. Bouwman, A. F. et al. A global high-resolution emission inventory for ammonia.  
383 *Global Biogeochem. Cy.* **11**, 561–587 (1997).
- 384 70. Andreae, M. O. Emission of trace gases and aerosols from biomass burning – an  
385 updated assessment. *Atmos. Chem. Phys.* **19**, 8523–8546 (2019).
- 386 71. Fu, H., Luo, Z. & Hu, S. A temporal-spatial analysis and future trends of ammonia  
387 emissions in China. *Sci. Total Environ.* **731**, 138897 (2020).
- 388 72. Pan, Y. P. et al. Fossil fuel combustion-related emissions dominate atmospheric  
389 ammonia sources during severe haze episodes: Evidence from <sup>15</sup>N-stable isotope in  
390 size-resolved aerosol ammonium. *Environ. Sci. Technol.* **50**, 8049–8056 (2016).
- 391 73. Heaton, T. H. E., Spiro, B. & Robertson, S. M. C. Potential canopy influences on the  
392 isotopic composition of nitrogen and sulphur in atmospheric deposition. *Oecologia*  
393 **109**, 600–607 (1997).
- 394 74. Walters, W. W., Blum, D. E. & Hastings, M. G. Selective collection of particulate  
395 ammonium for nitrogen isotopic characterization using a denuder-filter pack  
396 sampling device. *Anal. Chem.* **91**, 7586–7594 (2019).
- 397 75. Urey, H. C. The thermodynamic properties of isotopic substances. *J. Chem. Soc.*  
398 562–581 (1947).
- 399 76. Kawashima, H. & Ono, S. Nitrogen isotope fractionation from ammonia gas to  
400 ammonium in particulate ammonium chloride. *Environ. Sci. Technol.* **53**, 10629–  
401 10635 (2019).
- 402 77. Zhang, Y., Liu, X. J., Fangmeier, A., Goulding, K. T. W. & Zhang, F. S. Nitrogen  
403 inputs and isotopes in precipitation in the North China Plain. *Atmos. Environ.* **42**,  
404 1436–1448 (2008).
- 405 78. Wu, L. B. et al. Aerosol ammonium in the urban boundary layer in Beijing: Insights  
406 from nitrogen isotope ratios and simulations in summer 2015. *Environ. Sci. Technol.*  
407 *Lett.* **6**, 389–395 (2019).

- 408 79. Zhang, Y. Y. et al. Persistent nonagricultural and periodic agricultural emissions  
409 dominate sources of ammonia in urban Beijing: Evidence from <sup>15</sup>N stable isotope in  
410 vertical profiles. *Environ. Sci. Technol.* **54**, 102–109 (2020).
- 411 80. Moore, H. Isotopic measurement of atmospheric nitrogen compounds. *Tellus B.* **26**,  
412 169–174 (1974).
- 413 81. Moore, H. The isotopic composition of ammonia, nitrogen dioxide and nitrate in the  
414 atmosphere. *Atmos. Environ.* **11**, 1239–1243 (1977).
- 415 82. Hayasaka, H., Fukuzaki, N., Kondo, S., Ishizuka, T. & Totsuka, T. Nitrogen isotopic  
416 ratios of gaseous ammonia and ammonium aerosols in the atmosphere. *J. Jap. Soc.*  
417 *Atmos. Environ.* **39**, 272–279 (2004) (in Japanese with English abstract).
- 418 83. Fukuzaki, N. & Hayasaka, H. Seasonal variations of nitrogen isotopic ratios of  
419 ammonium and nitrate in precipitations collected in the Yahiko–Kakuda Mountains  
420 Area in Niigata Prefecture, Japan. *Water Air Soil Poll.* **203**, 391–397 (2009).

421 **Supplementary Text 1. Publications with the  $\delta^{15}\text{N}_{\text{a-NH}_3}$  observations.**

- 422 84. Berner, A. H. & Felix, J. D. Investigating ammonia emissions in a coastal urban  
423 airshed using stable isotope techniques. *Sci. Total Environ.* **707**, 134952 (2020).
- 424 85. Bhattarai, N. et al. Sources of gaseous  $\text{NH}_3$  in urban Beijing from parallel sampling  
425 of  $\text{NH}_3$  and  $\text{NH}_4^+$ , their nitrogen isotope measurement and modeling. *Sci. Total*  
426 *Environ.* **747**, 141361 (2020).
- 427 86. Buzek, F. et al. Isotope composition of  $\text{NH}_3$ ,  $\text{NO}_x$  and  $\text{SO}_2$  air pollution in the  
428 Moravia-Silesian region, Czech Republic. *Atmos. Pollut. Res.* **8**, 221–232 (2017).
- 429 87. Chang, Y. H. et al. Assessing contributions of agricultural and nonagricultural  
430 emissions to atmospheric ammonia in a Chinese megacity. *Environ. Sci. Technol.* **53**,  
431 1822–1833 (2019).
- 432 88. Chang, Y. H., Liu, X. J., Deng, C. R., Dore, A. J. & Zhuang, G. S. Source  
433 apportionment of atmospheric ammonia before, during, and after the 2014 APEC  
434 summit in Beijing using stable nitrogen isotope signatures. *Atmos. Chem. Phys.* **16**,  
435 11635–11647 (2016).
- 436 89. Felix, J. D., Elliott, E. M. & Gay, D. A. Spatial and temporal patterns of nitrogen  
437 isotopic composition of ammonia at U.S. ammonia monitoring network sites. *Atmos.*  
438 *Environ.* **150**, 434–442 (2017).
- 439 90. Hayasaka, H., Fukuzaki, N., Kondo, S., Ishizuka, T. & Totsuka, T. Nitrogen isotopic  
440 ratios of gaseous ammonia and ammonium aerosols in the atmosphere. *J. Jpn. Soc.*  
441 *Atmos. Environ.* **39**, 272–279 (2004). (in Japanese with English abstract)
- 442 91. Kawashima, H. & Ono, S. Nitrogen isotope fractionation from ammonia gas to  
443 ammonium in particulate ammonium chloride. *Environ. Sci. Technol.* **53**, 10629–  
444 10635 (2019).
- 445 92. Moore, H. The isotopic composition of ammonia, nitrogen dioxide and nitrate in the  
446 atmosphere. *Atmos. Environ.* **11**, 1239–1243 (1977).
- 447 93. Pan, Y. P. et al. Systematic low bias of passive samplers in characterizing nitrogen  
448 isotopic composition of atmospheric ammonia. *Atmos. Res.* **243**, 105018 (2020).
- 449 94. Savard, M. M., Cole, A., Smirnov, A. & Vet, R.  $\delta^{15}\text{N}$  values of atmospheric N  
450 species simultaneously collected using sector-based samplers distant from sources–  
451 Isotopic inheritance and fractionation. *Atmos. Environ.* **162**, 11–22 (2017).
- 452 95. Smirnov, A., Savard, M. M., Vet, R. & Simard, M. C. Nitrogen and triple oxygen  
453 isotopes in near-road air samples using chemical conversion and thermal  
454 decomposition. *Rapid Commun. Mass Sp.* **26**, 2791–2804 (2012).
- 455 96. Stratton, J. J., Ham, J., Collett Jr, J. L., Benedict, K. & Borch, T. Assessing the  
456 efficacy of nitrogen isotopes to distinguish Colorado Front Range ammonia sources  
457 affecting Rocky Mountain National Park. *Atmos. Environ.* **215**, 116881 (2019).
- 458 97. Ti, C. P. et al. Isotopic characterization of  $\text{NH}_x\text{-N}$  in deposition and major emission  
459 sources. *Biogeochemistry* **138**, 85–102 (2018).

- 460 98. Walters, W. W. & Hastings, M. G. Collection of ammonia for high time-resolved  
461 nitrogen isotopic characterization utilizing an acid-coated honeycomb denuder. *Anal.*  
462 *Chem.* **90**, 8051–8057 (2018).
- 463 99. Walters, W. W., Blum, D. E. & Hastings, M. G. Selective collection of particulate  
464 ammonium for nitrogen isotopic characterization using a denuder-filter pack  
465 sampling device. *Anal. Chem.* **91**, 7586–7594 (2019).
- 466 100. Zhang, Y. Y. et al. Atmospheric ammonia in Beijing during the COVID-19 outbreak:  
467 Concentrations, sources, and implications. *Environ. Sci. Technol. Lett.* 32–38 (2020).
- 468 101. Zhang, Y. Y. et al. Persistent nonagricultural and periodic agricultural emissions  
469 dominate sources of ammonia in urban Beijing: Evidence from <sup>15</sup>N stable isotope in  
470 vertical profiles. *Environ. Sci. Technol.* **54**, 102–109 (2020).

471 **Supplementary Text 2. Publications with  $\delta^{15}\text{N}_{\text{w-NH}_4^+}$  observations.**

- 472 102. Altieri, K. E., Hastings, M. G., Peters, A. J., Oleynik, S. & Sigman, D. M. Isotopic  
473 evidence for a marine ammonium source in rainwater at Bermuda. *Global*  
474 *Biogeochem. Cy.* **28**, 1066–1080 (2014).
- 475 103. Buzek F., Černý J. & Pačes, T. The behavior of nitrogen isotopes in acidified forest  
476 soils in the Czech Republic. *Water Air Soil Poll.* **105**, 155–164 (1998).
- 477 104. Buzek, F. et al.  $^{15}\text{N}$  study of the reactivity of atmospheric nitrogen in four mountain  
478 forest catchments (Czech Republic, central Europe). *Appl. Geochem.* **116**, 104567  
479 (2020).
- 480 105. Chen, F. J. et al. Monthly variations of the nitrogen isotope of ammonium in wet  
481 deposition in a tropical city of South China. *Aerosol Air Qual. Res.* **20**, 1062–1069  
482 (2020).
- 483 106. Chen, Z. L. et al. Atmospheric nitrogen deposition in Yangtze River Delta: insights  
484 gained from the nitrogen content and isotopic composition of the moss *Haplocladium*  
485 *microphyllum*. *Atmos. Ocean. Sci. Lett.* **13**, 202–209 (2019).
- 486 107. Cieżka, M., Modelska, M., Górka, M., Trojanowska-Olichwer, A. & Widory, D.  
487 Chemical and isotopic interpretation of major ion compositions from precipitation: a  
488 one-year temporal monitoring study in Wrocław, SW Poland. *J. Atmos. Chem.* **73**,  
489 61–80 (2016).
- 490 108. Cui, J. et al. A comparison of various approaches used in source apportionments for  
491 precipitation nitrogen in a mountain region of southwest China. *Environ. Pollut.* **241**,  
492 810–820 (2018).
- 493 109. Cui, J. et al. Seasonal fluxes and sources apportionment of dissolved inorganic  
494 nitrogen wet deposition at different land-use sites in the Three Gorges reservoir area.  
495 *Ecotox. Environ. Safe.* **193**, 110344 (2020).
- 496 110. Du, F. Inorganic sulfur and nitrogen isotope variation in atmospheric precipitation at  
497 Chengdu, China. Master Thesis, Chengdu University of Technology. (2012) (in  
498 Chinese with English abstract).
- 499 111. Freyer, H. D. Seasonal trends of  $\text{NH}_4^+$  and  $\text{NO}_3^-$  nitrogen isotope composition in rain  
500 collected at Jülich, Germany. *Tellus B.* **30**, 83–92 (1978).
- 501 112. Fukuzaki, N. & Hayasaka, H. Seasonal variations of nitrogen isotopic ratios of  
502 ammonium and nitrate in precipitations collected in the Yahiko-Kakuda Mountains  
503 Area in Niigata Prefecture, Japan. *Water Air Soil Poll.* **203**, 391–397 (2009).
- 504 113. Gao, Y. Atmospheric nitrogen deposition to Barnegat Bay. *Atmos. Environ.* **36**, 5783–  
505 5794 (2002).
- 506 114. Garten, C. T. Nitrogen isotope composition of ammonium and nitrate in bulk  
507 precipitation and forest throughfall. *Intern. J. Environ. Anal. Chem.* **47**, 33–45  
508 (1992).
- 509 115. Hall, S. J. et al. Convergence in nitrogen deposition and cryptic isotopic variation  
510 across urban and agricultural valleys in northern Utah. *J. Geophys. Res. Biogeo.* **121**,

- 511 2340–2355 (2016).
- 512 116.Heaton, T. H. E.  $^{15}\text{N}/^{14}\text{N}$  ratios of nitrate and ammonium in rain at Pretoria, South  
513 Africa. *Atmos. Environ.* **21**, 843–852 (1987).
- 514 117.Heaton, T. H. E., Spiro, B. & Robertson, S. M. C. Potential canopy influences on the  
515 isotopic composition of nitrogen and sulphur in atmospheric deposition. *Oecologia*  
516 **109**, 600–607 (1997).
- 517 118.Hoering, T. The isotopic composition of the ammonia and the nitrate ion in rain.  
518 *Geochim. Cosmochim. Acta* **12**, 97–102 (1957).
- 519 119.Huang, S. N. et al. Seasonal pattern of ammonium  $^{15}\text{N}$  natural abundance in  
520 precipitation at a rural forested site and implications for  $\text{NH}_3$  source partitioning.  
521 *Environ. Pollut.* **247**, 541–549 (2019).
- 522 120.Jia, G. D. & Chen, F. J. Monthly variations in nitrogen isotopes of ammonium and  
523 nitrate in wet deposition at Guangzhou, south China. *Atmos. Environ.* **44**, 2309–2315  
524 (2010).
- 525 121.Knapp, A. N., Hastings, M. G., Sigman, D. M., Lipschultz, F. & Galloway, J. N. The  
526 flux and isotopic composition of reduced and total nitrogen in Bermuda rain. *Mar.*  
527 *Chem.* **120**, 83–89 (2010).
- 528 122.Koba, K. et al. The  $^{15}\text{N}$  natural abundance of the N lost from an N-saturated  
529 subtropical forest in southern China. *J. Geophys. Res. Biogeo.* **117**, G02015 (2012).
- 530 123.Lee, K. S. et al. Nitrogen isotope ratios of dissolved organic nitrogen in wet  
531 precipitation in a metropolis surrounded by agricultural areas in southern Korea. *Agr.*  
532 *Ecosyst. Environ.* **159**, 161–169 (2012).
- 533 124.Leng, Q. M. et al. Wet-only deposition of atmospheric inorganic nitrogen and  
534 associated isotopic characteristics in a typical mountain area, southwestern China.  
535 *Sci. Total Environ.* **616–617**, 55–63 (2018).
- 536 125.Li, X. D., Masuda, H., Koba, K. & Zeng, H. A. Nitrogen isotope study on nitrate-  
537 contaminated groundwater in the Sichuan Basin, China. *Water Air Soil Poll.* **178**,  
538 145–156 (2007).
- 539 126.Li, Z. J. Stable isotope characteristics of nitrogen deposition and historical trajectory  
540 under conditions of different human activity. Ph.D. Thesis, University of Chinese  
541 Academy of Sciences. (2019) (in Chinese with English abstract).
- 542 127.Liu, D. W., Fang, Y. T., Tu, Y. & Pan, Y. P. Chemical method for nitrogen isotopic  
543 analysis of ammonium at natural abundance. *Anal. Chem.* **86**, 3787–3792 (2014).
- 544 128.Liu, X. Y. et al. Stable isotope analyses of precipitation nitrogen sources in Guiyang,  
545 southwestern China. *Environ. Pollut.* **230**, 486–494 (2017).
- 546 129.Moore, H. Isotopic measurement of atmospheric nitrogen compounds. *Tellus B.* **26**,  
547 169–174 (1974).
- 548 130.Moore, H. The isotopic composition of ammonia, nitrogen dioxide and nitrate in the  
549 atmosphere. *Atmos. Environ.* **11**, 1239–1243 (1977).
- 550 131.Nanus, L., Campbell, D. H., Lehmann, C. M. B. & Mast, M. A. Spatial and temporal

- 551 variation in sources of atmospheric nitrogen deposition in the Rocky Mountains  
552 using nitrogen isotopes. *Atmos. Environ.* **176**, 110–119 (2018).
- 553 132.Proemse, B. C., Mayer, B., Fenn, M. E. & Ross, C. S. A multi-isotope approach for  
554 estimating industrial contributions to atmospheric nitrogen deposition in the  
555 Athabasca oil sands region in Alberta, Canada. *Environ. Pollut.* **182**, 80–91 (2013).
- 556 133.Russell, K. M., Galloway, J. N., Macko, S. A., Moody, J. L. & Scudlark, J. R.  
557 Sources of nitrogen in wet deposition to the Chesapeake Bay Region. *Atmos.*  
558 *Environ.* **32**, 2453–2465 (1998).
- 559 134.Savard, M. M., Cole, A., Smirnov, A. & Vet, R.  $\delta^{15}\text{N}$  values of atmospheric N  
560 species simultaneously collected using sector-based samplers distant from sources–  
561 Isotopic inheritance and fractionation. *Atmos. Environ.* **162**, 11–22 (2017).
- 562 135.Smirnov, A., Savard, M. M., Vet, R. & Simard, M. C. Nitrogen and triple oxygen  
563 isotopes in near-road air samples using chemical conversion and thermal  
564 decomposition. *Rapid Commun. Mass Sp.* **26**, 2791–2804 (2012).
- 565 136.Stratton, J. J., Ham, J., Collett Jr, J. L., Benedict, K. & Borch, T. Assessing the  
566 efficacy of nitrogen isotopes to distinguish Colorado Front Range ammonia sources  
567 affecting Rocky Mountain National Park. *Atmos. Environ.* **215**, 116881 (2019).
- 568 137.Sun L. Y. Atmospheric nitrogen and phosphorus deposition in Nanjing and effects of  
569 simulated nitrogen deposition on gaseous emissions of soils. Ph.D. Thesis, Nanjing  
570 Agricultural University. (2014) (in Chinese with English abstract).
- 571 138.Ti, C. P. et al. Isotopic characterization of  $\text{NH}_x\text{-N}$  in deposition and major emission  
572 sources. *Biogeochemistry* **138**, 85–102 (2018).
- 573 139.Xiao, H. W., Xiao, H. Y., Long, A. M. & Liu, C. Q.  $\delta^{15}\text{N-NH}_4^+$  variations of  
574 rainwater: Application of the Rayleigh model. *Atmos. Res.* **157**, 49–55 (2015).
- 575 140.Xiao, H. W., Xiao, H. Y., Long, A. M., Wang, Y. L. Who controls the monthly  
576 variations of  $\text{NH}_4^+$  nitrogen isotope composition in precipitation? *Atmos. Environ.*  
577 **54**, 201–206 (2012).
- 578 141.Xiao, H. Y. & Liu, C. Q. Sources of nitrogen and sulfur in wet deposition at Guiyang,  
579 southwest China. *Atmos. Environ.* **36**, 5121–5130 (2002).
- 580 142.Xie, Y. X. et al. Source of nitrogen in wet deposition to a rice agroecosystem at Tai  
581 lake region. *Atmos. Environ.* **42**, 5182–5192 (2008).
- 582 143.Zhang, Y., Liu, X. J., Fangmeier, A., Goulding, K. T. W. & Zhang, F. S. Nitrogen  
583 inputs and isotopes in precipitation in the North China Plain. *Atmos. Environ.* **42**,  
584 1436–1448 (2008).
- 585 144.Zhao, X. et al. Spatial and temporal variation of inorganic nitrogen wet deposition to  
586 the Yangtze River Delta Region, China. *Water Air Soil Poll.* **203**, 277–289 (2009).



587 **Supplementary Text 3. Publications with  $\delta^{15}\text{N}_{\text{p-NH}_4^+}$  observations.**

- 588 145. Bhattarai, N. et al. Sources of gaseous  $\text{NH}_3$  in urban Beijing from parallel sampling  
589 of  $\text{NH}_3$  and  $\text{NH}_4^+$ , their nitrogen isotope measurement and modeling. *Sci. Total*  
590 *Environ.* **747**, 141361 (2020).
- 591 146. Hall, S. J. et al. Convergence in nitrogen deposition and cryptic isotopic variation  
592 across urban and agricultural valleys in northern Utah. *J. Geophys. Res. Biogeo.* **121**,  
593 2340–2355 (2016).
- 594 147. Hayasaka, H., Fukuzaki, N., Kondo, S., Ishizuka, T. & Totsuka, T. Nitrogen isotopic  
595 ratios of gaseous ammonia and ammonium aerosols in the atmosphere. *J. Jpn. Soc.*  
596 *Atmos. Environ.* **39**, 272–279 (2004). (in Japanese with English abstract)
- 597 148. Heaton, T. H. E.  $^{15}\text{N}/^{14}\text{N}$  ratios of nitrate and ammonium in rain at Pretoria, South  
598 Africa. *Atmos. Environ.* **21**, 843–852 (1987).
- 599 149. Jickells, T. D. et al. Isotopic evidence for a marine ammonia source. *Geophys. Res.*  
600 *Lett.* **30**, 1374 (2003).
- 601 150. Kawashima, H. & Kurahashi, T. Inorganic ion and nitrogen isotopic compositions of  
602 atmospheric aerosols at Yurihonjo, Japan: Implications for nitrogen sources. *Atmos.*  
603 *Environ.* **45**, 6309–6316 (2011).
- 604 151. Kundu, S., Kawamura, K. & Lee, M. Seasonal variation of the concentrations of  
605 nitrogenous species and their nitrogen isotopic ratios in aerosols at Gosan, Jeju  
606 Island: Implications for atmospheric processing and source changes of aerosols. *J.*  
607 *Geophys. Res. Atmos.* **115**, D20305 (2010).
- 608 152. Lim, S. et al. Fossil-driven secondary inorganic  $\text{PM}_{2.5}$  enhancement in the North  
609 China Plain: Evidence from carbon and nitrogen isotopes. *Environ. Pollut.* **266**,  
610 115163 (2020).
- 611 153. Lin, C. T., Jickells, T. D., Baker, A. R., Marca, A. & Johnson, M. T. Aerosol isotopic  
612 ammonium signatures over the remote Atlantic Ocean. *Atmos. Environ.* **133**, 165–  
613 169 (2016).
- 614 154. Moore, H. The isotopic composition of ammonia, nitrogen dioxide and nitrate in the  
615 atmosphere. *Atmos. Environ.* **11**, 1239–1243 (1977).
- 616 155. Pan, Y. P. et al. Fossil fuel combustion-related emissions dominate atmospheric  
617 ammonia sources during severe haze episodes: Evidence from  $^{15}\text{N}$ -stable isotope in  
618 size-resolved aerosol ammonium. *Environ. Sci. Technol.* **50**, 8049–8056 (2016).
- 619 156. Pan, Y. P. et al. Isotopic evidence for enhanced fossil fuel sources of aerosol  
620 ammonium in the urban atmosphere. *Environ. Pollut.* **238**, 942–947 (2018).
- 621 157. Pan, Y. P. et al. Source apportionment of aerosol ammonium in an ammonia-rich  
622 atmosphere: An isotopic study of summer clean and hazy days in urban Beijing. *J.*  
623 *Geophys. Res. Atmos.* **123**, 5681–5689 (2018).
- 624 158. Park, Y. M. et al. Characterizing isotopic compositions of TC-C,  $\text{NO}_3^-$ -N, and  $\text{NH}_4^+$ -  
625 N in  $\text{PM}_{2.5}$  in South Korea: Impact of China's winter heating. *Environ. Pollut.* **233**,  
626 735–744 (2018).

- 627 159.Proemse, B. C., Mayer, B., Chow, J. C. & Watson, J. G. Isotopic characterization of  
628 nitrate, ammonium and sulfate in stack PM<sub>2.5</sub> emissions in the Athabasca Oil Sands  
629 Region, Alberta, Canada. *Atmos. Environ.* **60**, 555–563 (2012).
- 630 160.Savard, M. M., Cole, A., Smirnoff, A. & Vet, R.  $\delta^{15}\text{N}$  values of atmospheric N  
631 species simultaneously collected using sector-based samplers distant from sources–  
632 Isotopic inheritance and fractionation. *Atmos. Environ.* **162**, 11–22 (2017).
- 633 161.Smirnoff, A., Savard, M. M., Vet, R. & Simard, M. C. Nitrogen and triple oxygen  
634 isotopes in near-road air samples using chemical conversion and thermal  
635 decomposition. *Rapid Commun. Mass Sp.* **26**, 2791–2804 (2012).
- 636 162.Ti, C. P. et al. Isotopic characterization of NH<sub>x</sub>-N in deposition and major emission  
637 sources. *Biogeochemistry* **138**, 85–102 (2018).
- 638 163.Walters, W. W., Blum, D. E. & Hastings, M. G. Selective collection of particulate  
639 ammonium for nitrogen isotopic characterization using a denuder-filter pack  
640 sampling device. *Anal. Chem.* **91**, 7586–7594 (2019).
- 641 164.Wu, C. et al. Non-agricultural sources dominate the atmospheric NH<sub>3</sub> in Xi'an, a  
642 megacity in the semi-arid region of China. *Sci. Total Environ.* **722**, 137756 (2020).
- 643 165.Wu, L. B. et al. Aerosol ammonium in the urban boundary layer in Beijing: Insights  
644 from nitrogen isotope ratios and simulations in summer 2015. *Environ. Sci. Technol.*  
645 *Lett.* **6**, 389–395 (2019).
- 646 166.Wu, S. P. et al. Nitrogen isotope composition of ammonium in PM<sub>2.5</sub> in the Xiamen,  
647 China: Impact of non-agricultural ammonia. *Environ. Sci. Pollut. Res. Int.* **26**,  
648 25596–25608 (2019).
- 649 167.Xiang, Y. K., Cao, F., Yang, X. Y., Zhao, X. Y. & Zhang, Y. L. Hypobromite  
650 oxidation combined with hydroxylamine hydrochloride reduction method for  
651 analyzing ammonium nitrogen isotope in atmospheric samples. *Chin. J. Appl. Ecol.*  
652 **30**, 1847–1853 (2019) (in Chinese with English abstract).
- 653 168.Xiao, H. W. et al. Enhanced biomass burning as a source of aerosol ammonium over  
654 cities in Central China in autumn. *Environ. Pollut.* **266**, 115278 (2020).
- 655 169.Yeatman, S. G., Spokes, L. J., Dennis, P. F. & Jickells, T. D. Can the study of  
656 nitrogen isotopic composition in size-segregated aerosol nitrate and ammonium be  
657 used to investigate atmospheric processing mechanisms? *Atmos. Environ.* **35**, 1337–  
658 1345 (2001).
- 659 170.Yeatman, S. G., Spokes, L. J., Dennis, P. F., Jickells, T. D. Comparisons of aerosol  
660 nitrogen isotopic composition at two polluted coastal sites. *Atmos. Environ.* **35**,  
661 1307–1320 (2001).
- 662 171.Zhang, Z. Y. et al. Fossil fuel-related emissions were the major source of NH<sub>3</sub>  
663 pollution in urban cities of northern China in the autumn of 2017. *Environ. Pollut.*  
664 **256**, 113428 (2020).
- 665 172.Zhou, Y. H. et al. Biomass burning related ammonia emissions promoted a self-  
666 amplifying loop in the urban environment in Kunming (SW China). *Atmos. Environ.*  
667 **253**, 118138 (2020).

- 668 **Supplementary Text 4. Publications with simultaneous  $C_{a-NH_3}$  and  $C_{p-NH_4^+}$**   
669 **observations.**
- 670 **East Asia**
- 671 173.Adams, P. J., Seinfeld, J. H. & Koch, D. M. Global concentrations of tropospheric  
672 sulfate, nitrate, and ammonium aerosol simulated in a general circulation model. *J.*  
673 *Geophys. Res. Atmos.* **104**, 13791–13823 (1999).
- 674 174.Aikawa, M., Hiraki, T. & Tamaki, M. Characteristics in concentration of chemical  
675 species in ambient air based on three-year monitoring by filter pack method. *Water*  
676 *Air Soil Poll.* **161**, 335–352 (2005).
- 677 175.Aikawa, M., Hiraki, T., Mukai, H. & Murano, K. Characteristic variation of  
678 concentration and chemical form in sulfur, nitrate, ammonium, and chloride species  
679 observed at urban and rural sites of Japan. *Water Air Soil Poll.* **190**, 287–297 (2008).
- 680 176.Chang, L. T. C., Tsai, J. H., Lin, J. M., Huang, Y. S. & Chiang, H. L. Particulate  
681 matter and gaseous pollutants during a tropical storm and air pollution episode in  
682 Southern Taiwan. *Atmos. Res.* **99**, 67–79 (2011).
- 683 177.Cheng, M. T., Horng, C. L. & Lin, Y. C. Characteristics of atmospheric aerosol and  
684 acidic gases from urban and forest sites in central Taiwan. *Bull. Environ. Contam.*  
685 *Toxicol.* **79**, 674–677 (2007).
- 686 178.Chiwa, M., Uemura, T., Otsuki, K. & Sakugawa, H. Characteristics of nitrogenous  
687 air pollutants at urban and suburban forested sites, Western Japan. *Water Air Soil*  
688 *Poll.* **223**, 5473–5481 (2012).
- 689 179.Cui, J., Zhou, J. & Yang, H. Atmospheric inorganic nitrogen in dry deposition to a  
690 typical red soil agro-ecosystem in southeastern China. *J. Environ. Monitor.* **12**, 1287–  
691 1294 (2010).
- 692 180.Duong Huu, H., Le Tu, T., To Thi, H., Noro, K. & Takenaka, N. Characteristics of  
693 ammonia gas and fine particulate ammonium from two distinct urban areas: Osaka,  
694 Japan, and Ho Chi Minh City, Vietnam. *Environ. Sci. Poll. Res.* **24**, 8147–8163  
695 (2017).
- 696 181.Fu, Y. D. et al. Atmospheric dry and bulk nitrogen deposition to forest environment  
697 in the North China Plain. *Atmos. Pollut. Res.* **10**, 1636–1642 (2019).
- 698 182.Gu, M. N. et al. Concurrent collection of ammonia gas and aerosol ammonium in  
699 urban Beijing during national celebration days utilizing an acid-coated honeycomb  
700 denuder in combination with a filter system. *Environ. Sci.* **42**, 1–8 (2021) (in Chinese  
701 with English abstract).
- 702 183.Hayashi, K., Matsuda, K., Ono, K., Tokida, T. & Hasegawa, T. Amelioration of the  
703 reactive nitrogen flux calculation by a day/night separation in weekly mean air  
704 concentration measurements. *Atmos. Environ.* **79**, 462–471 (2013).
- 705 184.Kawashima H. Seasonal trends of the stable nitrogen isotope ratio in particulate  
706 nitrogen compounds and their gaseous precursors in Akita, Japan. *Tellus B.* **71**,  
707 1627846 (2019).

- 708 185.Kim, J. S., Bais, A. L., Kang, S. H., Lee, J. & Park, K. A semi-continuous  
709 measurement of gaseous ammonia and particulate ammonium concentrations in  
710 PM<sub>2.5</sub> in the ambient atmosphere. *J. Atmos. Chem.* **68**, 251–263 (2011).
- 711 186.Li, K. H. et al. Atmospheric reactive nitrogen concentrations at ten sites with  
712 contrasting land use in an arid region of central Asia. *Biogeosciences* **9**, 4013–4021  
713 (2012).
- 714 187.Liang, T. et al. High nitrogen deposition in an agricultural ecosystem of Shaanxi,  
715 China. *Environ. Sci. Pollut. Res.* **23**, 13210–13221 (2016).
- 716 188.Lin, N. H. et al. A preliminary analysis of chemical characteristics of atmospheric  
717 pollutants and their deposition budget on the Fu-Shan forest in Taiwan. *Terr. Atmos.  
718 Ocean. Sci.* **11**, 481–500 (2000).
- 719 189.Luo, X. S. et al. An evaluation of atmospheric N-r pollution and deposition in North  
720 China after the Beijing Olympics. *Atmos. Environ.* **74**, 209–216 (2013).
- 721 190.Luo, X. S. et al. Chinese coastal seas are facing heavy atmospheric nitrogen  
722 deposition. *Environ. Res. Lett.* **9**, 095007 (2014).
- 723 191.Matsumoto, K. et al. Organic and inorganic nitrogen deposition on the red pine  
724 forests at the northern foot of Mt. Fuji, Japan. *Atmos. Environ.* **237** (2020).
- 725 192.Matsumoto, M. & Okita, T. Long term measurements of atmospheric gaseous and  
726 aerosol species using an annular denuder system in Nara, Japan. *Atmos. Environ.* **32**,  
727 1419–1425 (1998).
- 728 193.Matsumoto, R., Umezawa, N., Karaushi, M., Yonemochi, S. I. & Sakamoto, K.  
729 Comparison of ammonium deposition flux at roadside and at an agricultural area for  
730 long-term monitoring: Emission of ammonia from vehicles. *Water Air Soil Poll.* **173**,  
731 355–371 (2006).
- 732 194.Meng, Z. Y. et al. Seasonal Variation of Ammonia and Ammonium Aerosol at a  
733 Background Station in the Yangtze River Delta Region, China. *Aerosol Air Qual.  
734 Res.* **14**, 756–766 (2014).
- 735 195.Meng, Z. Y., Lin, W. L., Zhang, R. J., Han, Z. W. & Jia, X. F. Summertime ambient  
736 ammonia and its effects on ammonium aerosol in urban Beijing, China. *Sci. Total  
737 Environ.* **579**, 1521–1530 (2017).
- 738 196.Murano, K. et al. Wet deposition of ammonium and atmospheric distribution of  
739 ammonia and particulate ammonium in Japan. *Environ. Pollut.* **102**, 321–326 (1998).
- 740 197.Pathak, R. K. & Chan, C. K. Inter-particle and gas-particle interactions in sampling  
741 artifacts of PM<sub>2.5</sub> in filter-based samplers. *Atmos. Environ.* **39**, 1597–1607 (2005).
- 742 198.Poor, N. et al. Nature and magnitude of atmospheric fluxes of total inorganic  
743 nitrogen and other inorganic species to the Tampa Bay watershed, FL, USA. *Water  
744 Air Soil Poll.* **170**, 267–283 (2006).
- 745 199.Quan, J. & Zhang, X. Assessing the role of ammonia in sulfur transformation and  
746 deposition in China. *Atmos. Res.* **88**, 78–88 (2008).
- 747 200.Sakurai, T., Fujita, S., Hayami, H. & Furuhashi, N. A study of atmospheric ammonia

- 748 by means of modeling analysis in the Kanto region of Japan. *Atmos. Environ.* **39**,  
749 203–210 (2005).
- 750 201. Shen, J. L. et al. Atmospheric dry and wet nitrogen deposition on three contrasting  
751 land use types of an agricultural catchment in subtropical central China. *Atmos.*  
752 *Environ.* **67**, 415–424 (2013).
- 753 202. Shen, J. L. et al. Impacts of pollution controls on air quality in Beijing during the  
754 2008 Olympic Games. *J. Environ. Qual.* **40**, 37–45 (2011).
- 755 203. Shimadera, H. et al. Sensitivity analyses of factors influencing CMAQ performance  
756 for fine particulate nitrate. *J. Air Waste Manage. Assoc.* **64**, 374–387 (2014).
- 757 204. Shon, Z. H. et al. Relationship between water-soluble ions in PM<sub>2.5</sub> and their  
758 precursor gases in Seoul megacity. *Atmos. Environ.* **59**, 540–550 (2012).
- 759 205. Tsai, J. H., Chang, L. P. & Chiang, H. L. Airborne pollutant characteristics in an  
760 urban, industrial and agricultural complex metroplex with high emission loading and  
761 ammonia concentration. *Sci. Total Environ.* **494**, 74–83 (2014).
- 762 206. Tsai, J. H., Chang, L. P. & Chiang, H. L. Size mass distribution of water-soluble  
763 ionic species and gas conversion to sulfate and nitrate in particulate matter in  
764 southern Taiwan. *Environ. Sci. Pollut. Res.* **20**, 4587–4602 (2013).
- 765 207. Wang, H. B. et al. Ambient concentration and dry deposition of major inorganic  
766 nitrogen species at two urban sites in Sichuan Basin, China. *Environ. Pollut.* **219**,  
767 235–244 (2016).
- 768 208. Wang, J. F. et al. Atmospheric ammonia/ammonium-nitrogen concentrations and wet  
769 and dry deposition rates in a double rice region in subtropical China. *Environ. Sci.*  
770 **38**, 2264–2272 (2017) (in Chinese with English abstract).
- 771 209. Wang, S. B. et al. Effect of ammonia on fine-particle pH in agricultural regions of  
772 China: comparison between urban and rural sites. *Atmos. Chem. Phys.* **20**, 2719–  
773 2734 (2020).
- 774 210. Wang, W. X. et al. Gas-phase ammonia and PM<sub>2.5</sub> ammonium in a busy traffic area  
775 of Nanjing, China. *Environ. Sci. Pollut. Res.* **23**, 1691–1702 (2016).
- 776 211. Wei, L. F. et al. Gas-to-particle conversion of atmospheric ammonia and sampling  
777 artifacts of ammonium in spring of Beijing. *Sci. China Earth Sci.* **58**, 345–355  
778 (2015).
- 779 212. Wen, Z. et al. Effects of reactive nitrogen gases on the aerosol formation in Beijing  
780 from late autumn to early spring. *Environ. Res. Lett.* **16**, 025005 (2021).
- 781 213. Wu, S. P. et al. Atmospheric ammonia measurements along the coastal lines of  
782 Southeastern China: Implications for inorganic nitrogen deposition to coastal waters.  
783 *Atmos. Environ.* **177**, 1–11 (2018).
- 784 214. Wu, S. P. et al. Nitrogen isotope composition of ammonium in PM<sub>2.5</sub> in the Xiamen,  
785 China: Impact of non-agricultural ammonia. *Environ. Sci. Pollut. Res.* **26**, 25596–  
786 25608 (2019).
- 787 215. Xu, J. et al. Importance of gas-particle partitioning of ammonia in haze formation in

- 788 the rural agricultural environment. *Atmos. Chem. Phys.* **20**, 7259–7269 (2020).
- 789 216. Xu, W., Zhang, L. & Liu, X. A database of atmospheric nitrogen concentration and  
790 deposition from the nationwide monitoring network in China. *Sci. Data* **6**, 51 (2019).
- 791 217. Yan, F. H. et al. Stabilization for the secondary species contribution to PM<sub>2.5</sub> in the  
792 Pearl River Delta (PRD) over the past decade, China: A meta-analysis. *Atmos.*  
793 *Environ.* **242**, 117817 (2020).
- 794 218. Zhang, X. et al. Pollution sources of atmospheric fine particles and secondary aerosol  
795 characteristics in Beijing. *J. Environ. Sci.* **95**, 91–98 (2020).
- 796 219. Zhang, Y. B. et al. Atmospheric deposition of inorganic nitrogen in a semi-arid  
797 grassland of Inner Mongolia, China. *J. Arid Land* **9**, 810–822 (2017).
- 798
- 799 **North America**
- 800 220. Adams, P. J., Seinfeld, J. H. & Koch, D. M. Global concentrations of tropospheric  
801 sulfate, nitrate, and ammonium aerosol simulated in a general circulation model. *J.*  
802 *Geophys. Res. Atmos.* **104**, 13791–13823 (1999).
- 803 221. Ammonia Monitoring Network (AMoN). Data were downloaded from  
804 <https://nadp.slh.wisc.edu/networks/ammonia-monitoring-network> (accessed on 12  
805 June 2020) (2020).
- 806 222. Benedict, K. B. et al. A seasonal nitrogen deposition budget for Rocky Mountain  
807 National Park. *Ecol. Appl.* **23**, 1156–1169 (2013).
- 808 223. Bytnerowicz, A. & Fenn, M. E. Nitrogen deposition in California forests: a review.  
809 *Environ. Pollut.* **92**, 127–146 (1996).
- 810 224. Bytnerowicz, A. et al. Summer-time distribution of air pollutants in Sequoia National  
811 Park, California. *Environ. Pollut.* **118**, 187–203 (2002).
- 812 225. Clean Air Status and Trends Network (CASTNET). Data were downloaded from  
813 <https://www.epa.gov/castnet> (accessed on 12 June 2020) (2020).
- 814 226. Chen, L. W. A., Doddridge, B. G., Dickerson, R. R., Chow, J. C. & Henry, R. C.  
815 Origins of fine aerosol mass in the Baltimore-Washington corridor: Implications  
816 from observation, factor analysis, and ensemble air parcel back trajectories. *Atmos.*  
817 *Environ.* **36**, 4541–4554 (2002).
- 818 227. Cheng, B. & Wang-Li, L. Responses of secondary inorganic PM<sub>2.5</sub> to precursor gases  
819 in an ammonia abundant area in North Carolina. *Aerosol Air Qual. Res.* **19**, 1126–  
820 1138 (2019).
- 821 228. Cheng, B., Wang-Li, L., Classen, J., Meskhidze, N. & Bloomfield, P. Spatial and  
822 temporal variations of atmospheric chemical condition in the Southeastern US.  
823 *Atmos. Res.* **248**, 105190 (2021).
- 824 229. Edgerton, E. S., Hsu, Y. M., White, E. M., Fenn, M. E. & Landis, M. S. Ambient  
825 concentrations and total deposition of inorganic sulfur, inorganic nitrogen and base  
826 cations in the Athabasca Oil Sands Region. *Sci. Total Environ.* **706**, 134864 (2020).

- 827 230.Fahey, T. J. et al. Nitrogen deposition in and around an intensive agricultural district  
828 in central New York. *J. Environ. Qual.* **28**, 1585–1600 (1999).
- 829 231.Fenn, M. E., Geiser, L., Bachman, R., Blubaugh, T. J. & Bytnerowicz, A.  
830 Atmospheric deposition inputs and effects on lichen chemistry and indicator species  
831 in the Columbia River Gorge, USA. *Environ. Pollut.* **146**, 77–91 (2007).
- 832 232.Guo, H. et al. Fine-particle water and pH in the southeastern United States. *Atmos.*  
833 *Chem. Phys.* **15**, 5211–5228 (2015).
- 834 233.Herner, J. D., Aw, J., Gao, O., Chang, D. P. & Kleeman, M. J. Size and composition  
835 distribution of airborne particulate matter in northern California: I-particulate mass,  
836 carbon, and water-soluble ions. *J. Air Waste Manage. Assoc.* **55**, 30–51 (2005).
- 837 234.Langford, A. O., Fehsenfeld, F. C., Zachariassen, J. & Schimel, D. S. Gaseous  
838 ammonia fluxes and background concentrations in terrestrial ecosystems of the  
839 United States. *Global Biogeochem. Cy.* **6**, 459–483 (1992).
- 840 235.Li, Y. et al. Observations of ammonia, nitric acid, and fine particles in a rural gas  
841 production region. *Atmos. Environ.* **83**, 80–89 (2014).
- 842 236.McCurdy, T., Zelenka, M. P., Lawrence, P. M., Houston, R. M. & Burton, R. Acid  
843 aerosols in the Pittsburgh Metropolitan area. *Atmos. Environ.* **33**, 5133–5145 (1999).
- 844 237.Robarge, W. P., Walker, J. T., McCulloch, R. B. & Murray, G. Atmospheric  
845 concentrations of ammonia and ammonium at an agricultural site in the southeast  
846 United States. *Atmos. Environ.* **36**, 1661–1674 (2002).
- 847 238.Saylor, R. D., Edgerton, E. S., Hartsell, B. E., Baumann, K. & Hansen, D. A.  
848 Continuous gaseous and total ammonia measurements from the southeastern aerosol  
849 research and characterization (SEARCH) study. *Atmos. Environ.* **44**, 4994–5004  
850 (2010).
- 851 239.Saylor, R., Myles, L., Sibble, D., Caldwell, J. & Xing, J. Recent trends in gas-phase  
852 ammonia and PM<sub>2.5</sub> ammonium in the Southeast United States. *J. Air Waste*  
853 *Manage. Assoc.* **65**, 347–357 (2015).
- 854 240.Walker, J. T., Robarge, W. P., Shendrikar, A. & Kimball, H. Inorganic PM<sub>2.5</sub> at a US  
855 agricultural site. *Environ. Pollut.* **139**, 258–271 (2006).
- 856 241.Walker, J. T., Whittall, D. R., Robarge, W. & Paerl, H. W. Ambient ammonia and  
857 ammonium aerosol across a region of variable ammonia emission density. *Atmos.*  
858 *Environ.* **38**, 1235–1246 (2004).
- 859 242.Walters, W. W., Blum, D. E. & Hastings, M. G. Selective collection of particulate  
860 ammonium for nitrogen isotopic characterization using a denuder-filter pack  
861 sampling device. *Anal. Chem.* **91**, 7586–7594 (2019).
- 862 243.Weber, R. J., Guo, H., Russell, A. G. & Nenes, A. High aerosol acidity despite  
863 declining atmospheric sulfate concentrations over the past 15 years. *Nat. Geosci.* **9**,  
864 282–285 (2016).

865

866 **Europe**

- 867 244.Adams, P. J., Seinfeld, J. H. & Koch, D. M. Global concentrations of tropospheric  
868 sulfate, nitrate, and ammonium aerosol simulated in a general circulation model. *J.*  
869 *Geophys. Res. Atmos.* **104**, 13791–13823 (1999).
- 870 245.Alexa, L. & Mikuska, P. Simultaneous determination of gaseous ammonia and  
871 particulate ammonium in ambient air using a cylindrical wet effluent diffusion  
872 denuder and a continuous aerosol sampler. *Anal. Chem.* **92**, 15827–15836 (2020).
- 873 246.Anatolaki, C. & Tsitouridou, R. Atmospheric deposition of nitrogen, sulfur and  
874 chloride in Thessaloniki, Greece. *Atmos. Res.* **85**, 413–428 (2007).
- 875 247.Bencs, L. et al. Mass and ionic composition of atmospheric fine particles over  
876 Belgium and their relation with gaseous air pollutants. *J. Environ. Monitor.* **10**, 1148–  
877 1157 (2008).
- 878 248.Bytnerowicz, A. et al. Chemical composition of air, soil and vegetation in forests of  
879 the Silesian Beskid Mountains, Poland. *Water Air Soil Poll.* **116**, 141–150 (1999).
- 880 249.Dammgen, U. Atmospheric nitrogen dynamics in Hesse, Germany: Creating the data  
881 base - 2. Atmospheric concentrations of ammonia, its reaction partners and products  
882 at Linden. *Landbauforschung Volkenrode* **57**, 157–170 (2007).
- 883 250.Dammgen, U. Fine particles and their constituents in Germany - Results of denuder  
884 filter measurements. *Landbauforsch. Volkenrode* **235**, 181–188 (2002).
- 885 251.Danalatos, D. & Glavas, S. Gas phase nitric acid, ammonia and related particulate  
886 matter at a Mediterranean coastal site, Patras, Greece. *Atmos. Environ.* **33**, 3417–  
887 3425 (1999).
- 888 252.Ehrnsperger, L. & Klemm, O. Source apportionment of urban ammonia and its  
889 contribution to secondary particle formation in a mid-size European city. *Aerosol Air*  
890 *Qual. Res.* **21**, 200404 (2021).
- 891 253.Erduran, M. S. & Tuncel, S. G. Sampling and analysis of gaseous pollutants and  
892 related particulate matter in a Mediterranean site: Antalya-Turkey. *J. Environ.*  
893 *Monitor.* **3**, 661–665 (2001).
- 894 254.Ferm, M. & Hellsten, S. Trends in atmospheric ammonia and particulate ammonium  
895 concentrations in Sweden and its causes. *Atmos. Environ.* **61**, 30–39 (2012).
- 896 255.Held, A., Wrzesinsky, T., Mangold, A., Gerchau, J. & Klemm, O. Atmospheric phase  
897 distribution of oxidized and reduced nitrogen at a forest ecosystem research site.  
898 *Chemosphere* **48**, 697–706 (2002).
- 899 256.Hesterberg, R. et al. Deposition of nitrogen-containing compounds to an extensively  
900 managed grassland in central Switzerland. *Environ. Pollut.* **91**, 21–34 (1996).
- 901 257.Horvath, L. & Sutton, M. A. Long-term record of ammonia and ammonium  
902 concentrations at K-puszt, Hungary. *Atmos. Environ.* **32**, 339–344 (1998).
- 903 258.Kirkitsos, P. D. & Sikiotis, D. Nitric acid, ammonia and particulate nitrates, sulphates  
904 and ammonium in the atmosphere of Athens. *Ekistics* **58**, 156–163 (1991).
- 905 259.Lee, D. S., Dollard, G. J., Derwent, R. G. & Pepler, S. Observations on gaseous and  
906 aerosols components of the atmosphere and their relationships. *Water Air Soil Poll.*



- 907       **113**, 175–202 (1999).
- 908   260.Lewandowska, A., Falkowska, L. & Beldowska, M. Ammonia and ammonium over  
909       the southern Baltic Sea. Part 2. The origin of ammonia and ammonium over two  
910       coastal stations: Gdynia and Hel. *Oceanologia* **46**, 185–200 (2004).
- 911   261.Makkonen, U. et al. Semi-continuous gas and inorganic aerosol measurements at a  
912       boreal forest site: seasonal and diurnal cycles of NH<sub>3</sub>, HONO and HNO<sub>3</sub>. *Boreal*  
913       *Environ. Res.* **19**, 311–328 (2014).
- 914   262.Marner, B. B. & Harrison, R. M. A spatially refined monitoring based study of  
915       atmospheric nitrogen deposition. *Atmos. Environ.* **38**, 5045–5056 (2004).
- 916   263.Metzger, S., Dentener, F., Krol, M., Jeuken, A. & Lelieveld, J. Gas/aerosol  
917       partitioning - 2. Global modeling results. *J. Geophys. Res. Atmos.* **107**, ACH-1-ACH  
918       17–23 (2002).
- 919   264.Neirynck, J. et al. Fluxes of oxidised and reduced nitrogen above a mixed coniferous  
920       forest exposed to various nitrogen emission sources. *Environ. Pollut.* **149**, 31–43  
921       (2007).
- 922   265.Pandolfi, M. et al. Summer ammonia measurements in a densely populated  
923       Mediterranean city. *Atmos. Chem. Phys.* **12**, 7557–7575 (2012).
- 924   266.Plessow, K., Spindler, G., Zimmermann, F. & Matschullat, K. Seasonal variations  
925       and interactions of N-containing gases and particles over a coniferous forest, Saxony,  
926       Germany. *Atmos. Environ.* **39**, 6995–7007 (2005).
- 927   267.Ramsay, R. et al. Surface-atmosphere exchange of inorganic water-soluble gases and  
928       associated ions in bulk aerosol above agricultural grassland pre- and postfertilisation.  
929       *Atmos. Chem. Phys.* **18**, 16953–16978 (2018).
- 930   268.Smith, A. M. et al. Ammonia sources, transport, transformation, and deposition in  
931       coastal New England during summer. *J. Geophys. Res. Atmos.* **112**, D10S08 (2007).
- 932   269.Sutton, M. A. et al. Establishing the link between ammonia emission control and  
933       measurements of reduced nitrogen concentrations and deposition. *Environ. Monit.*  
934       *Assess.* **82**, 149–185 (2003).
- 935   270.Sutton, M. A. et al. Fluxes of ammonia over oilseed rape - Overview of the  
936       EXAMINE experiment. *Agr. Forest Meteorol.* **105**, 327–349 (2000).
- 937   271.Tang, Y. S. et al. Acid gases and aerosol measurements in the UK (1999-2015):  
938       regional distributions and trends. *Atmos. Chem. Phys.* **18**, 16293–16324 (2018).
- 939   272.Tang, Y. S. et al. Drivers for spatial, temporal and long-term trends in atmospheric  
940       ammonia and ammonium in the UK. *Atmos. Chem. Phys.* **18**, 705–733 (2018).
- 941   273.Tang, Y. S. et al. European scale application of atmospheric reactive nitrogen  
942       measurements in a low-cost approach to infer dry deposition fluxes. *Agr. Ecosyst.*  
943       *Environ.* **133**, 183–195 (2009).
- 944   274. UKEAP: National Ammonia Monitoring Network. Data were downloaded from  
945       <https://uk-air.defra.gov.uk/networks> (accessed on 16 October 2020) (2020).
- 946   275.Van Zanten, M. C., Kruit, R. J. W., Hoogerbrugge, R., Van der Swaluw, E. & Van

- 947 Pul, W. A. J. Trends in ammonia measurements in the Netherlands over the period  
948 1993–2014. *Atmos. Environ.* **148**, 352–360 (2017).
- 949 276. Vogt, E., Held, A. & Klemm, O. Sources and concentrations of gaseous and  
950 particulate reduced nitrogen in the city of Munster (Germany). *Atmos. Environ.* **39**,  
951 7393–7402 (2005).
- 952 277. Wolff, V., Trebs, I., Foken, T. & Meixner, F. X. Exchange of reactive nitrogen  
953 compounds: concentrations and fluxes of total ammonium and total nitrate above a  
954 spruce canopy. *Biogeosciences* **7**, 1729–1744 (2010).
- 955 278. Zimmerling, R., Dammggen, U., Kusters, A., Grunhage, L. & Jager, H. J. Response of  
956 a grassland ecosystem to air pollutants. IV. The chemical climate: concentrations of  
957 relevant non-criteria pollutants (trace gases and aerosols). *Environ. Pollut.* **91**, 139–  
958 147 (1996).
- 959 279. Zimmermann, F., Plessow, K., Queck, R., Bernhofer, C. & Matschullat, J.  
960 Atmospheric N- and S-fluxes to a spruce forest - Comparison of inferential modeling  
961 and the throughfall method. *Atmos. Environ.* **40**, 4782–4796 (2006).
